# Supplementary material
Source: PubMed Central journal article supplement (PMC5795399)
Supplement: 10.1074_O117.067082_mcp.O117.067082-1.pdf [file 10.1074_O117.067082_mcp.O117.067082-1.pdf]

## **Supplementary Material, Methods and Figures**

### **MS Western, a Method of Multiplexed Absolute Protein Quantification is a Practical Alternative to Western Blotting**

Mukesh Kumar<sup>1</sup>, Shai R. Joseph<sup>1</sup>, Martina Augsburg<sup>2</sup>, Aliona Bogdanova<sup>1</sup>, David Drechsel<sup>1</sup>, Nadine L. Vastenhouw<sup>1</sup>, Frank Buchholz<sup>1,2,3,4</sup>, Marc Gentzel<sup>1,5</sup>, Andrej Shevchenko<sup>1#</sup>

<sup>1</sup>Max Planck Institute of Molecular Cell Biology and Genetics, Pfotenhauerstrasse 108, 01307 Dresden, Germany

<sup>2</sup>Medical Systems Biology, UCC, Medical Faculty Carl Gustav Carus, TU Dresden, Dresden, Germany

<sup>3</sup>German Cancer Research Center (DKFZ), Heidelberg and German Cancer Consortium (DKTK) partner site Dresden, Dresden, Germany

<sup>4</sup>National Center for Tumor Diseases (NCT), University Hospital Carl Gustav Carus, TU Dresden, Dresden, Germany

<sup>5</sup>Present address: Center for Molecular and Cellular Bioengineering, TU Dresden, Germany

# Corresponding author

## Supplementary Material and Methods

### Protein analysis by GeLC-MS/MS

Proteins were *in-gel* digested with trypsin (Shevchenko et al, 2006) and peptides extracted from a gel matrix were dried down in a vacuum centrifuge, re-dissolved in 5% aqueous FA and 5  $\mu$ L were injected using an autosampler into a Dionex Ultimate 3000 nano-HPLC system equipped with 300  $\mu$ m i.d.  $\times$  5 mm trap column and 75  $\mu$ m  $\times$  15 cm Acclaim PepMap100 C18 analytical column. 0.1% aqueous FA and acetonitrile were used as solvents A and B, respectively. Samples were loaded onto the trap column for 5 min with the solvent A at the flow rate of 20  $\mu$ L/min. Then the trap column was switched on-line to the separation column and flow rate was set to 200nL/min. Peptides were separated using 180 min gradient elution program: a linear gradient from 0% to 30% B was delivered in 145 min and increased to 100% B in 10 min and maintained for another 5 min, dropped to 0%B in 10 min and maintained for another 10 min for column equilibration.

### Expression of chimeric proteins

Synthetic genes produced by GeneArt (Thermo Fisher Scientific) or GenScript (Piscataway NJ) were sub-cloned into pET expression vector and transformed into an *E.coli* strain that was dual auxotroph for arginine and lysine ( $\Delta$ Arg $\Delta$ LysBL21 (DE3) T1 pRARE). Fresh transformants were inoculated into a synthetic media MDAG-135 (Studier F.W, 2005) supplemented with antibiotics (100  $\mu$ g/ml ampicillin and 15  $\mu$ g/ml chloramphenicol) and incubated overnight at 37°C on a shaking platform. This overnight starting culture was further diluted 1000-fold by PA-5052 and MDAG-135 media supplemented with the same antibiotics and incubated at 37°C until OD<sub>600</sub> =0.5. Cells in MDAG-135 media were induced by 0.2mM isopropyl  $\beta$ -d-1-thiogalactopyranoside (IPTG), while this was not required in PA-5052 auto-inducing media. After 4 to 6 hr post induction cells were pelleted, re-suspended in

2x phosphate-buffered saline (PBS), aliquoted, snap frozen in liquid nitrogen and stored at -80°C until analysed. Prior analyses frozen aliquots were thawed and cell lysed in an equal volume of 2x Laemmli buffer by incubating at 80°C for 15 minutes. Samples were clarified by centrifugation and the supernatant subjected to 1D SDS PAGE on a 4-20% pre-cast gradient gel. Proteins were visualized by Coomassie staining and full length expression of corresponding synthetic genes was validated by *in-gel* digestion and LC-MS/MS of recovered peptides.

### **Quantification of target proteins in HeLa cells extracts**

HeLa cells were cultured in Dulbecco's modified Eagle's medium supplemented with 10% fetal calf serum and 1% penicillin-streptomycin (Gibco™ Life Technologies).  $1 \times 10^7$  HeLa cells were re-suspended in 100  $\mu$ L RIPA buffer containing Complete Protease Inhibitor Cocktail, EDTA-free (Roche). Equal volume of 2x Laemmli buffer was added and incubated at 80°C for 15 minutes with intermittent vortexing. Next, the sample was incubated with benzonase at 37°C for 30 minutes. The sample was centrifuged and supernatant was transferred to a new vial and further diluted with RIPA / 2x Laemmli buffer (1:1, v/v). The sample obtained at each dilution step was subjected to 1D SDS PAGE on two different gels. One gel was analyzed by WB utilizing the LI-COR Odyssey system and another by MS Western using bands of isotopically labelled CP03 and BSA as the internal standard and reference protein, respectively. To equalize the protein amount analyzed by both methods 50  $\mu$ L of the extract were loaded on a gel processed by MS Western protocol and an aliquot corresponding to 20% of recovered tryptic peptides was analysed by LC-MS/MS. For the analysis on an Odyssey system 10  $\mu$ L of extracts were loaded onto 4-12% Bis-Tris gel (NuPAGE, Life Technologies) and proteins blotted onto a nitrocellulose membrane (Amersham Protran 0.45 $\mu$ m, GE Healthcare). Primary antibodies (Supplementary Table S6) were applied and incubated overnight at 4°C. After washing the secondary antibodies

(Supplementary Table S6) were applied in the dark at room temperature for 30 min and the membrane was washed three times. Membranes were scanned with Odyssey Infrared Imager (LI-COR) at the channel 700 for ladder and GAPDH and channel 800 for GOI at highest possible intensity without saturation. Signals were measured using the Image Studio Software (version 2.1) by applying rectangles with background correction 'median left/right 3'. The GOI was normalized to GAPDH.

### **Knockdown experiments in HeLa cells**

For knock-down (KD) experiments  $2 \times 10^5$  HeLa cells were seeded in 6 well plates containing 2ml of supplemented DMEM and after 24h the medium was exchanged to 2ml antibiotic-free DMEM. For each transfection, 300 ng of esiRNA (Eupheria Biotech, Dresden, Germany) against the genes of interest (AKT1, CAT, PLK1, and TUBA4A) were dissolved in 200  $\mu$ l OptiMEM (Gibco™, Life Technologies), combined with 7  $\mu$ l Oligofectamine reagent (Invitrogen) in 70  $\mu$ l OptiMEM, incubated for 20 min and then pipetted into the individual wells. All KDs were performed in triplicate; renilla luciferase transfections as RNAi specificity controls were performed on a separate plate. Cells transfected with AKT1-, CAT-, and RLuc-esiRNA were harvested 72h post-transfection (except PLK1 and TUBA4A that were harvested after 24h and 48h, respectively, to avoid cell death) by washing with PBS and detaching cells with 0.05% Trypsin-EDTA (Gibco™ Life Technologies) for 5 min at 37°C. Cells were re-suspended in 1 ml culture media followed by manual counting using disposable chambers FastRead 102 (Biosigma S.r.l., Cona, Italy. Cell suspension contained in each well was transferred into a 1.5 ml Eppendorf tube and pelleted by spinning at 0.1 rcf at room temperature. The supernatant was aspirated and discarded and cells were washed twice with 1ml PBS. Cell pellets were re-suspended in 100  $\mu$ l RIPA-buffer containing protease inhibitors, aliquoted and stored at -20°C until analysis. Aliquots of the thawed pellet were analysed by MS Western and Odyssey WB as described above. Further details on the

employed antibodies and esiRNA probes are provided in Supplementary Tables S6 and S7, respectively.

## Supplementary Figures

Twin strep tag-3C cleavage site- GP (1-8)-Ubiquitin (9-12)-ADH (13-18)-Enolase (19-25)-BSA (26-31)-His-tag

MGSAWSHPQFEKGGGSGGGSGGSAWSHPQFEKLEVLFGPAAAKVFADYEEYVK<sub>1</sub>DFYELEPH  
K<sub>2</sub>VAAAFPGDVDRR<sub>3</sub>GLAGVENVTELK<sub>4</sub>IGEEYISDLQLRVIFLENYRR<sub>6</sub>LLSYVDDEAFIRVLVLDLE  
R<sub>8</sub>TLSDYNIQK<sub>9</sub>ESTLHLVLRR<sub>10</sub>TITLEVEPSDTIENVK<sub>11</sub>EGIPPDQQRR<sub>12</sub>IGDYAGIKK<sub>13</sub>VLGIDGGEGK  
K<sub>14</sub>EALDFFARR<sub>15</sub>VVGLSTLPEIYEK<sub>16</sub>ANELLINVK<sub>17</sub>GVIFYESHGK<sub>18</sub>GNPTVEVELTTEK<sub>19</sub>TFAEALR  
R<sub>20</sub>AADALLLK<sub>21</sub>TAGIQIVADDLTVTNPKK<sub>22</sub>NVNDVIAPAFVK<sub>23</sub>VNQIGTLESSEIKK<sub>24</sub>AVDDFLISLDGT  
ANK<sub>25</sub>HLVDEPQNLIKK<sub>26</sub>YLYEIARR<sub>27</sub>QTALVELLKK<sub>28</sub>LGEYGFQNALIVRR<sub>29</sub>DAFLGSFLYEYSRR<sub>30</sub>LVN  
ELTEFAK<sub>31</sub>GSGHHHHHH

**Fig. S1:** Sequence design of the chimeric protein CP01. The proteotypic peptides were selected from five commercially available proteins: Glycogen phosphorylase (GP), Ubiquitin, Alcohol dehydrogenase (ADH), Enolase and BSA. The peptides originating from the respective proteins are colour coded as exemplified in the header. Numbers in parenthesis represent the peptides numbers in the assembled chimera sequence which belongs to the corresponding proteins, e.g. peptide 1 to 8 belong to GP; peptides 9 to 12 belong to Ubiquitin *etc.* The sequence string assembled from sequences of proteotypic peptides (here peptide 1 to peptide 31) is flanked with twin-strep-tag and his-tag at the N- and C-terminus, respectively. The cleavage site for the 3C protease is placed after the twin-strep-tag.

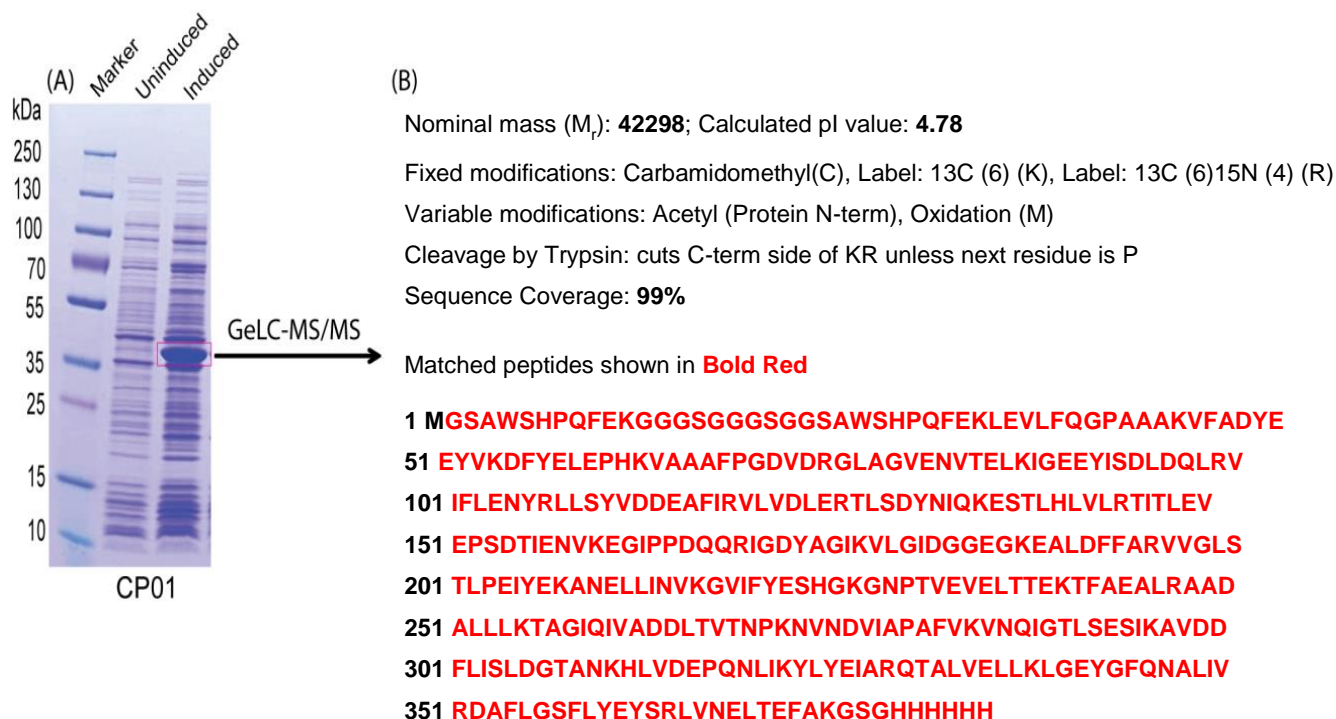

**Fig. S2:** Expression and validation of the sequence of chimeric protein CP01. (A) 1D SDS-PAGE analysis (4-20% gradient gel) showing the overexpressed CP01 (B) in-gel digestion of CP01 with trypsin followed by LC-MS/MS analysis of recovered tryptic peptides confirms its accurate full length expression. MS/MS spectra were mapped to the CP01 sequence by the Mascot search (mass accuracy 5 ppm for precursor and 0.3Da for fragment ions; two missed cleavage site allowed) and indicated its 100% coverage.



Twin strep tag-3C cleavage site-GP (1-4)-H4 (5-9)-H2B (10-14)-H2A (15-16, 26)-H3 (17-19)-BSA (20-25)-His tag  
 MGS<sup>A</sup>W<sup>S</sup>H<sup>P</sup>Q<sup>F</sup>E<sup>K</sup>G<sup>G</sup>G<sup>S</sup>G<sup>G</sup>G<sup>S</sup>G<sup>S</sup>G<sup>S</sup>A<sup>S</sup>W<sup>S</sup>H<sup>P</sup>Q<sup>F</sup>E<sup>K</sup>L<sup>E</sup>V<sup>L</sup>F<sup>Q</sup>G<sup>P</sup>A<sup>A</sup>A<sup>K</sup>V<sup>F</sup>A<sup>D</sup>Y<sup>E</sup>E<sup>E</sup>Y<sup>V</sup>K<sub>1</sub>D<sup>F</sup>Y<sup>E</sup>L<sup>E</sup>P<sup>H</sup>  
K<sub>2</sub>V<sup>A</sup>A<sup>A</sup>F<sup>P</sup>G<sup>D</sup>V<sup>D</sup>R<sub>3</sub>G<sup>L</sup>A<sup>G</sup>V<sup>E</sup>N<sup>V</sup>T<sup>E</sup>LK<sub>4</sub>V<sup>F</sup>L<sup>E</sup>N<sup>V</sup>I<sup>R<sub>5</sub>D<sup>A</sup>V<sup>T</sup>Y<sup>T</sup>E<sup>H</sup>A<sup>K<sub>6</sub>I<sup>S</sup>G<sup>L</sup>I<sup>Y</sup>E<sup>E</sup>T<sup>R<sub>7</sub>T<sup>V</sup>T<sup>A</sup>M<sup>D</sup>V<sup>V</sup>Y  
 A<sup>L</sup>K<sub>8</sub>D<sup>N</sup>I<sup>Q</sup>G<sup>I</sup>T<sup>K</sup>P<sup>A</sup>I<sup>R<sub>9</sub>E<sup>S</sup>Y<sup>A</sup>I<sup>Y</sup>V<sup>Y</sup>K<sub>10</sub>A<sup>M</sup>G<sup>I</sup>M<sup>N</sup>S<sup>F</sup>V<sup>N</sup>D<sup>I</sup>F<sup>E</sup>R<sub>11</sub>L<sup>L</sup>L<sup>P</sup>G<sup>E</sup>L<sup>A</sup>K<sub>12</sub>Q<sup>V</sup>H<sup>P</sup>D<sup>T</sup>G<sup>I</sup>S<sup>S</sup>K<sub>13</sub>E<sup>I</sup>Q  
 T<sup>A</sup>VR<sub>14</sub>A<sup>G</sup>L<sup>Q</sup>F<sup>P</sup>V<sup>G</sup>R<sub>15</sub>H<sup>I</sup>Q<sup>L</sup>A<sup>V</sup>R<sub>16</sub>S<sup>T</sup>E<sup>L</sup>LIR<sub>17</sub>E<sup>I</sup>A<sup>Q</sup>D<sup>F</sup>K<sub>18</sub>Y<sup>R</sup>P<sup>G</sup>T<sup>V</sup>A<sup>L</sup>R<sub>19</sub>H<sup>L</sup>V<sup>D</sup>E<sup>P</sup>Q<sup>N</sup>L<sup>I</sup>K<sub>20</sub>Y<sup>L</sup>Y<sup>E</sup>I  
 AR<sub>21</sub>Q<sup>T</sup>A<sup>L</sup>V<sup>E</sup>L<sup>L</sup>K<sub>22</sub>L<sup>G</sup>E<sup>Y</sup>G<sup>F</sup>Q<sup>N</sup>A<sup>L</sup>I<sup>V</sup>R<sub>23</sub>D<sup>A</sup>F<sup>L</sup>G<sup>S</sup>F<sup>L</sup>Y<sup>E</sup>Y<sup>S</sup>R<sub>24</sub>L<sup>V</sup>N<sup>E</sup>L<sup>T</sup>E<sup>F</sup>A<sup>K<sub>25</sub>G<sup>S</sup>G<sup>H</sup>H<sup>H</sup>H<sup>H</sup>H<sup>H</sup>R<sup>E</sup>P  
 N<sup>A</sup>G<sup>T</sup>E<sup>A</sup>Q<sup>S</sup>Q<sup>D</sup>F<sub>26</sub></sup></sup></sup></sup></sup>

**Fig. S3:** Sequence design of the chimeric protein CP02. The proteotypic peptides were selected from four histones (H2A, H2B, H3 and H4) from zebrafish (*D. rerio*). The reference peptides were selected from glycogen phosphorylase (GP) and BSA and were placed at the N- and C-terminus respectively. The peptides originating from the respective proteins are colour coded as exemplified in the header. Numbers in parenthesis represent the peptides numbers in the assembled chimera sequence which belongs to the corresponding proteins, e.g. peptide 1 to 4 belong to GP; peptides 5 to 9 belong to Histone H4 etc. The sequence string assembled from sequences of proteotypic peptides (here peptide 1 to 25) is flanked with twin-strep-tag and his-tag at the N- and C-terminus, respectively. The cleavage site for the 3C protease was placed after the twin-strep-tag.

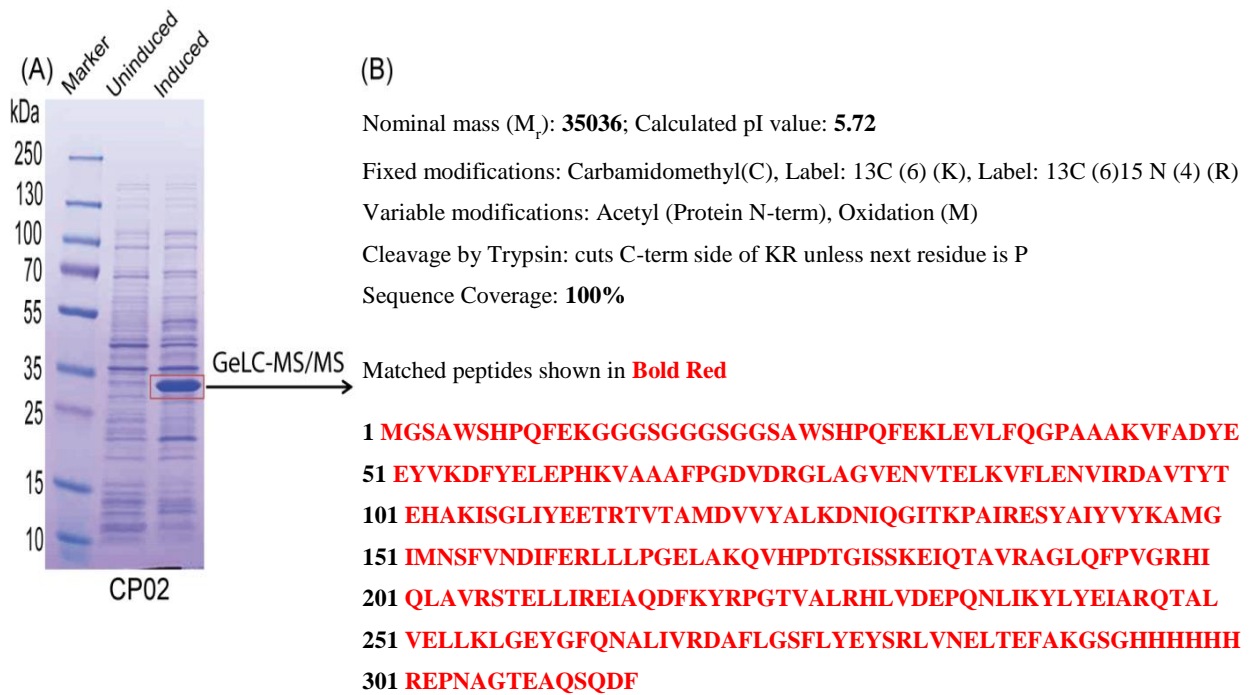

**Fig. S4:** Expression and validation of the sequence of chimeric protein CP02. (A) 1D SDS-PAGE analysis (4-20% gel) showing the overexpressed CP02 (B) in-gel digestion of CP02 with trypsin followed by LC-MS/MS analysis of recovered tryptic peptides confirms its accurate full length expression. MS/MS spectra were mapped to the CP02 sequence by the Mascot search (mass accuracy 5 ppm for precursor and 0.3Da for fragment ions; two missed cleavage site allowed) and indicated its 100% coverage.

Twin strep tag-3C cleavage site-GP (1-4)-PLK1 (5-10)-AKT1 (11-16)-PTEN (17-22)-Catalase (23-29)-  
 GAPDH (30-35)-Tubulin (36-41)-BSA (42-47)-His tag

MGSAWSHPQFEKGGGSGGGSSGSAWSHPQFEKLEVLFGPAAAKVFADYEEYVK<sub>1</sub>DFYELEPH  
 K<sub>2</sub>VAAAFPGDVDR<sub>3</sub>GLAGVENVTELK<sub>4</sub>LILYNDGDSLQYIER<sub>5</sub>AGVPGVAAPGAPAAAPPAK<sub>6</sub>LGN  
 LFLNEDLEVK<sub>7</sub>QEEAEDPACIPIFWVSK<sub>8</sub>HINPVAASLIQK<sub>9</sub>FSIAPSSLDPSNR<sub>10</sub>LFELILMEEIR<sub>11</sub>DE  
 VAHTLTENR<sub>12</sub>NDGTFIGYK<sub>13</sub>CLQWTTVIER<sub>14</sub>TFCGTPEYLAPEVLEDNDYGR<sub>15</sub>HPFLTALK<sub>16</sub>IYS  
 SNSGPTR<sub>17</sub>YVYYYSYLLK<sub>18</sub>FMYFEFPQPLPVCGDIK<sub>19</sub>NNIDDVVR<sub>20</sub>AQEALDFYGEVR<sub>21</sub>IYNLCA  
 ER<sub>22</sub>LSQEDPDYGIR<sub>23</sub>NAIHTFVQSGSHLAAR<sub>24</sub>DLFNAIATGK<sub>25</sub>FNTANDDNVTQVR<sub>26</sub>NLSVEDAA  
 R<sub>27</sub>AFYVNVLNNEEQR<sub>28</sub>DPILFPSFIHSQK<sub>29</sub>VPTANVSVVDLTCR<sub>30</sub>GALQNIPASTGAAK<sub>31</sub>VIHDNF  
 GIVEGLMTTVHAITATQK<sub>32</sub>LIVINGNPITIFQER<sub>33</sub>VGVNGFGR<sub>34</sub>LISWYDNEFGYSNR<sub>35</sub>VGINYQPP  
 TVVPGDLAK<sub>36</sub>TIGGGDDSFNTFFSETGAGK<sub>37</sub>AVFVDLEPTVIDEVR<sub>38</sub>NLDIERPTYTNLNR<sub>39</sub>IHF  
 PLATYAPVISA EK<sub>40</sub>QLFHPEQLITGK<sub>41</sub>HLVDEPQNLIK<sub>42</sub>YLYEIAR<sub>43</sub>QTALVELLK<sub>44</sub>LGEYGFQN  
 ALIVR<sub>45</sub>DAFLGSFLYEYSR<sub>46</sub>LVNELTEFAK<sub>47</sub>GSGHHHHHH

**Fig. S5:** Sequence design of the chimeric protein CP03. The proteotypic peptides were selected from six proteins (PLK1, AKT1, PTEN, Catalase, GAPDH and  $\alpha$ -Tubulin) from HeLa cells. The reference peptides were selected from glycogen phosphorylase (GP) and BSA and were placed at the N- and C-terminus respectively. The peptides originating from the respective proteins are colour coded as exemplified in the header. Numbers in parenthesis represent the peptides numbers in the assembled chimera sequence which belongs to the corresponding proteins, e.g. peptide 1 to 4 belong to GP; peptides 5 to 10 belongs to PLK1 etc. The sequence string assembled from sequences of proteotypic peptides (here peptide 1 to 47) is flanked with twin-strep-tag and his-tag at the N- and C-terminus, respectively. The cleavage site for the 3C protease was placed after the twin-strep-tag.

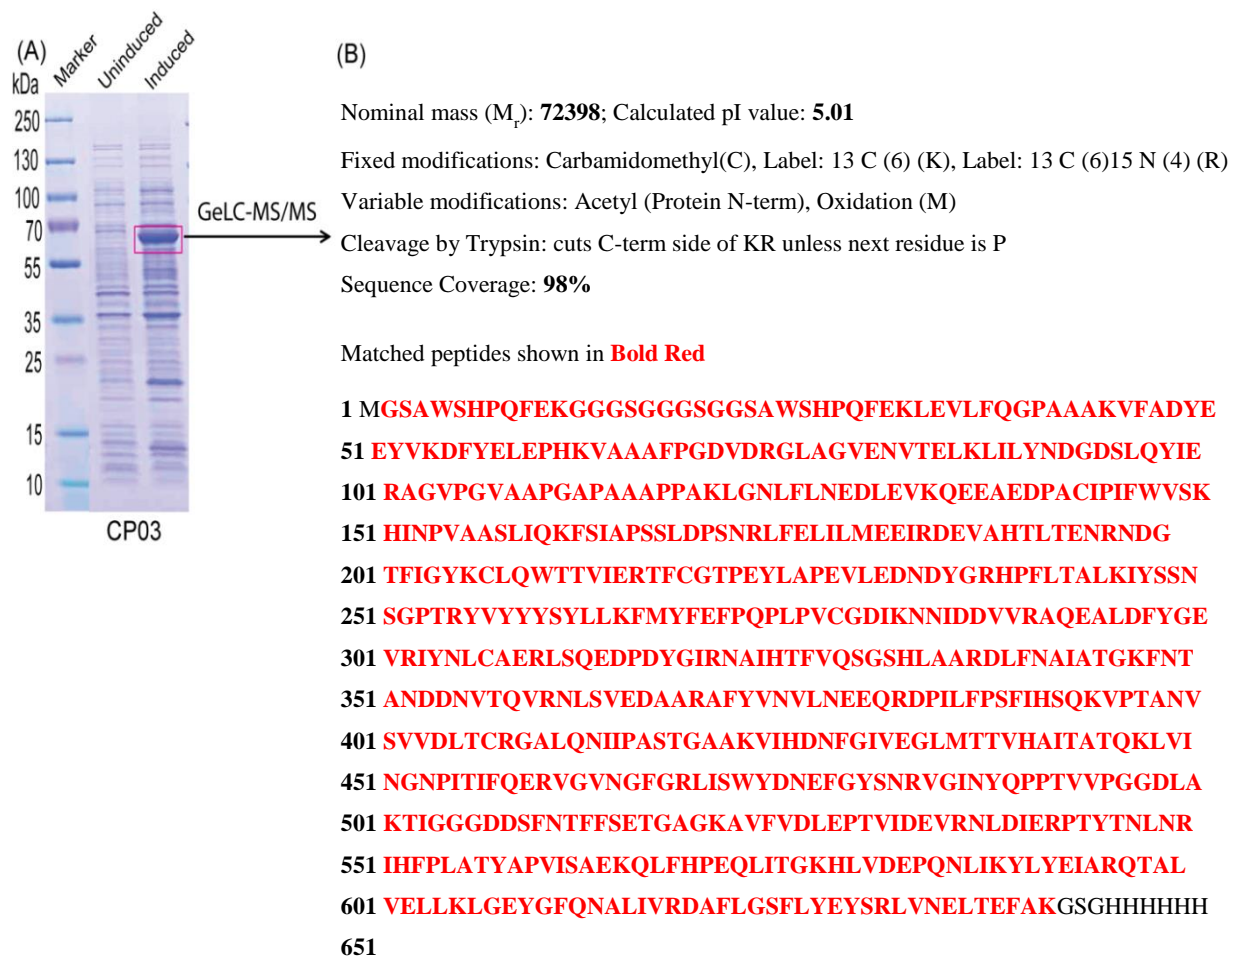

**Fig. S6:** Expression and validation of the sequence of chimeric protein CP03. (A) 1D SDS-PAGE analysis (4-20% gel) showing the overexpressed CP03 (B) in-gel digestion of CP03 with trypsin followed by LC-MS/MS analysis of recovered tryptic peptides confirms its accurate full length expression. MS/MS spectra were mapped to the CP03 sequence by the Mascot search (mass accuracy 5 ppm for precursor and 0.3Da for fragment ions; two missed cleavage site allowed) and indicated its 100% coverage.

Twin strep tag-3C cleavage site-GP (1-4)-187 target peptides (5-191) from 43 different eye proteins from *Drosophila melanogaster*-BSA (192-197)-His tag

MGSAWHPQFEKGGGSGGGSSAWHPQFEKLEVLVFPQPAAAKVFADYEEYVK<sub>1</sub>DFYELEPHK<sub>2</sub>VAAAFPGDVDR<sub>3</sub>GLAG  
 VENVTELK<sub>4</sub>GSTLSAQQGSQFK<sub>5</sub>NEPVSYILELINGR<sub>6</sub>NIGDSYVAAK<sub>7</sub>LDNGYNHLIEVVR<sub>8</sub>LVLGIPTYGR<sub>9</sub>FSPLVASNER<sub>10</sub>LT  
 EAEGSSLYIGGR<sub>11</sub>STDAEEDPQVIK<sub>12</sub>FADQDNDLVNLR<sub>13</sub>LSNFVDTTVAWLNLR<sub>14</sub>FFVSVTR<sub>15</sub>VQLTDLNR<sub>16</sub>DVFIPDVFNNY  
 K<sub>17</sub>ILAIFFPPGPSQYINVVPYLK<sub>18</sub>VPIWPYTLTYFR<sub>19</sub>GTFVSHK<sub>20</sub>GHEISVFSLTHK<sub>21</sub>APLGLHFHASWLK<sub>22</sub>IINNPEATQR<sub>23</sub>AV  
 YWVEHVSR<sub>24</sub>SHYHVGSAK<sub>25</sub>AEQNGYGVTVHYEELSSAK<sub>26</sub>GSAYAHAENTLR<sub>27</sub>SEGDLTQITPPSALGVQVR<sub>28</sub>AEEVEAVQI  
 IAESLK<sub>29</sub>AANQLTDRPTIINVAISPSSDR<sub>30</sub>GHGAGGADVLTYSK<sub>31</sub>DLNQGNSYVQDK<sub>32</sub>SLVFDVNDHNQR<sub>33</sub>SEYTGGLGAITEFR<sub>34</sub>  
 VVEFLDHLIDLGVAGFR<sub>35</sub>IGALDTSR<sub>36</sub>LIELLVR<sub>37</sub>LADLLLQEER<sub>38</sub>VNGEPVDVGAFFIR<sub>39</sub>ITPDVVGAIQVEATTYFR<sub>40</sub>ATQLS  
 EQLGSELTPK<sub>41</sub>LLAADYADGVSQPR<sub>42</sub>ILSWNAVNLVGLK<sub>43</sub>ASEQPGLTAIHTAFLR<sub>44</sub>LLPAQYEDGISAPR<sub>45</sub>GIATNDVGIK<sub>46</sub>  
 DTFSFLTGSGR<sub>47</sub>AINEGGFQSLPQK<sub>48</sub>FGLNEGSEPAQYIGLK<sub>49</sub>ITHTYTLNPR<sub>50</sub>AILVYLVEK<sub>51</sub>ITPGWEENWAGALDVK<sub>52</sub>IN  
 PQHSIPTLVNDNGFTIWESR<sub>53</sub>ALGLEFNK<sub>54</sub>INLDPYALYVIVEK<sub>55</sub>TNFDDSAFYASGESLK<sub>56</sub>VLTGGDAGSNR<sub>57</sub>LGSDVQPPG  
 R<sub>58</sub>VFLQLENQR<sub>59</sub>NLSQTFGNIWR<sub>60</sub>VFDLPDFLTWR<sub>61</sub>GSTVQFAAR<sub>62</sub>DGAISHVVFK<sub>63</sub>YFNAYLSDR<sub>64</sub>FSEPYDSTLSDVVK<sub>65</sub>N  
 VANLEATK<sub>66</sub>DADAIQQTLAK<sub>67</sub>GTQAEIVVADVTK<sub>68</sub>VGDVTEVAEVAFLASSK<sub>69</sub>SVLLTLR<sub>70</sub>IDALEGVYK<sub>71</sub>ALNLDYDYK<sub>72</sub>  
 AITPFLFWENK<sub>73</sub>LTLYGIDGSPVVR<sub>74</sub>ELPYEEANGSR<sub>75</sub>AVGVELNK<sub>76</sub>APADPEAFK<sub>77</sub>AIQVYLVEK<sub>78</sub>LLNLQAGEHLKPEFL  
 K<sub>79</sub>INPQHTIPTLVNDNGFALWESR<sub>80</sub>GLVVSCTR<sub>81</sub>SLSDVSLTGR<sub>82</sub>GNSYLILPPPR<sub>83</sub>ISGPSNHVTVVR<sub>84</sub>NAAFSGDSYVSHR<sub>85</sub>SV  
 VNVGLGQALR<sub>86</sub>STQEEVDHIR<sub>87</sub>SAVHDVEVFLK<sub>88</sub>VSTDAIDVSVGR<sub>89</sub>VALQIQDVATSSR<sub>90</sub>LLEISLR<sub>91</sub>LLELHDNR<sub>92</sub>LFNND  
 VLR<sub>93</sub>LAVLDLSHNR<sub>94</sub>ASLSGIQSHAFK<sub>95</sub>TFDGNPIHTLR<sub>96</sub>DFGVELEDLQITR<sub>97</sub>STISSTTVR<sub>98</sub>TSTTSSLTGNPR<sub>99</sub>TSVATVA  
 GGAVVGATK<sub>100</sub>LLVPGSSSTTTSSLR<sub>101</sub>LLPDTTDEQLLTSALEEK<sub>102</sub>STGNIFAAK<sub>103</sub>VFAVNSAGR<sub>104</sub>IFADNVYGR<sub>105</sub>GVAED  
 FAPSFVK<sub>106</sub>HDGGSPITGYIEK<sub>107</sub>HYPNPAVR<sub>108</sub>VVGSEADTGR<sub>109</sub>DAPTTESYLR<sub>110</sub>STVPFATSESNR<sub>111</sub>LVGGNDLDTPLIIR<sub>112</sub>  
 IAELEGLGSR<sub>113</sub>IQYLEDSTR<sub>114</sub>IGEAISQSSIR<sub>115</sub>FITQIVDVTK<sub>116</sub>AEDAGVYLVVAR<sub>117</sub>TYYDFGFVALDIK<sub>118</sub>VWQVSVSAHA  
 LLWDLNDGK<sub>119</sub>DVLSVAFSADNR<sub>120</sub>LWDLAAGK<sub>121</sub>LNNDLIAR<sub>122</sub>FQEALAGLSK<sub>123</sub>LAHDALGGAAK<sub>124</sub>SAGSGVSTTAIEK<sub>125</sub>  
 IVQVQIDVVGK<sub>126</sub>SELDFSDWLQVAR<sub>127</sub>FSQSDFGLDQGETLLR<sub>128</sub>ESLLEITYHQK<sub>129</sub>GAAYQEAPVDAEVAVTPK<sub>130</sub>ISAFG  
 LFTYSVFSIAGSLK<sub>131</sub>VFANPVQLEFYGFVPWSIQR<sub>132</sub>QVGASSGSSGAVSK<sub>133</sub>IVQIQVGPAPHLNVK<sub>134</sub>VQDNSVLVEGNHE  
 ER<sub>135</sub>VLPAIEAFQK<sub>136</sub>FSEATLDEIR<sub>137</sub>FHGVALAFNALDSK<sub>138</sub>ENAILTDIWNITPFK<sub>139</sub>VIVDILLK<sub>140</sub>TILVDLQVGK<sub>141</sub>LAEHL  
 AASVVAK<sub>142</sub>EAGLEIELAPK<sub>143</sub>AGFAGDDAPR<sub>144</sub>SYELPDGQVITIGNER<sub>145</sub>VAPEEHPVLLTEAPLNPK<sub>146</sub>GYSFTTTAER<sub>147</sub>EITS  
 LAPSTIK<sub>148</sub>EITALAPSTIK<sub>149</sub>QEYDESGPGIVHR<sub>150</sub>QEYDESGPSIVHR<sub>151</sub>SIELLEK<sub>152</sub>LQASGDFPTTK<sub>153</sub>EQNSPIYISR<sub>154</sub>ATVAA  
 FAASEGHAHPR<sub>155</sub>YQVIVK<sub>156</sub>SSDAQSQATASEAESK<sub>157</sub>ALSASSLIALSSR<sub>158</sub>DPVLTAFQLSWELK<sub>159</sub>DDYGITEDDIEVR<sub>160</sub>AT  
 AWWIVHR<sub>161</sub>VELELWVK<sub>162</sub>VVLPDLAVLR<sub>163</sub>ALGIEEQSGGAAR<sub>164</sub>VDEYGFFLYWK<sub>165</sub>YYLSDLAR<sub>166</sub>IEQADYLPTEQDILR<sub>167</sub>  
 VPTTGILEYPFDLDGIVFR<sub>168</sub>TIHTYPWFQNSSVILFLNK<sub>169</sub>AGIAVEGDIK<sub>170</sub>DAFGIIVSYAVK<sub>171</sub>DTALASTTLIASQDAR<sub>172</sub>DFL  
 LSPGELELEVTLTK<sub>173</sub>VFGQLATTYR<sub>174</sub>LQYAPLNR<sub>175</sub>ISLEVTDLR<sub>176</sub>LLQPAGTIEK<sub>177</sub>FYPEDVAEELIQDITLR<sub>178</sub>IGFPWSE  
 IR<sub>179</sub>THTAGFLANDR<sub>180</sub>LFYLQVK<sub>181</sub>AAIELNR<sub>182</sub>GNILLTK<sub>183</sub>VPPEVPPSK<sub>184</sub>LVDFIHR<sub>185</sub>SLVGVQK<sub>186</sub>QIDVETVADR<sub>187</sub>YI  
 QATDLSEASR<sub>188</sub>NAEYDQFLEDIQK<sub>189</sub>ATAWVIVHR<sub>190</sub>ALSASSLIALSSR<sub>191</sub>HLVDEPQNLK<sub>192</sub>YLYEIR<sub>193</sub>QALVELLK<sub>194</sub>LG  
 EYGFQNALIVR<sub>195</sub>DAFLGSFLYEYSR<sub>196</sub>LVNELTEFAK<sub>197</sub>SGSHHHHHH

**Fig. S7:** Sequence design of the chimeric protein CP04. The proteotypic peptides were selected from 43 proteins (For list of proteins see supplementary Table S4) from the eye of *Drosophila melanogaster*. The reference peptides were selected from glycogen phosphorylase (GP) and BSA and were placed at the N- and C-terminus respectively. The sequence string assembled from sequences of proteotypic peptides (here peptide 1 to 197) is flanked with twin-strep-tag and his-tag at the N- and C-terminus, respectively. The cleavage site for the 3C protease was placed after the twin-strep-tag.

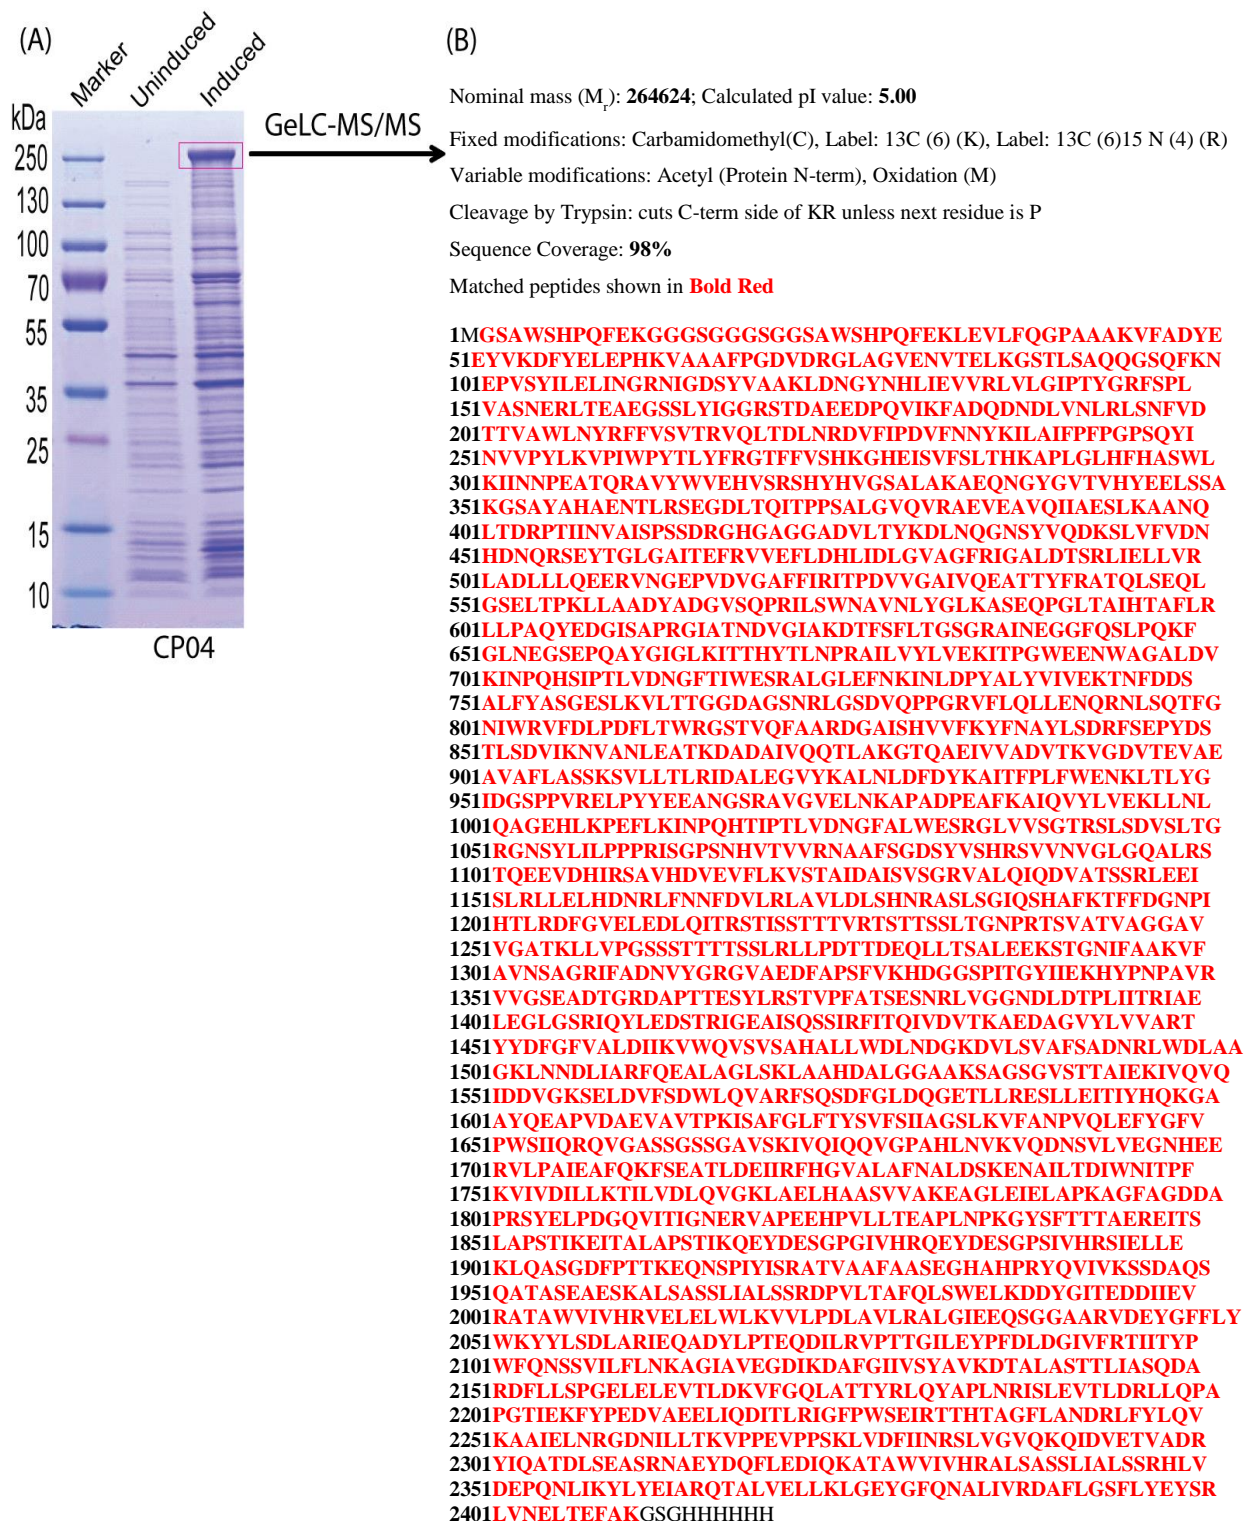

**Fig. S8:** Expression and validation of the sequence of chimeric protein CP04. (A) 1D SDS-PAGE analysis (4-20% gel) showing the overexpressed CP04 (B) in-gel digestion of CP03 with trypsin followed by LC-MS/MS analysis of recovered tryptic peptides confirms its accurate full length expression. MS/MS spectra were mapped to the CP04 sequence by the Mascot search (mass accuracy 5 ppm for precursor and 0.3Da for fragment ions; two missed cleavage site allowed) and indicated its 100% coverage.

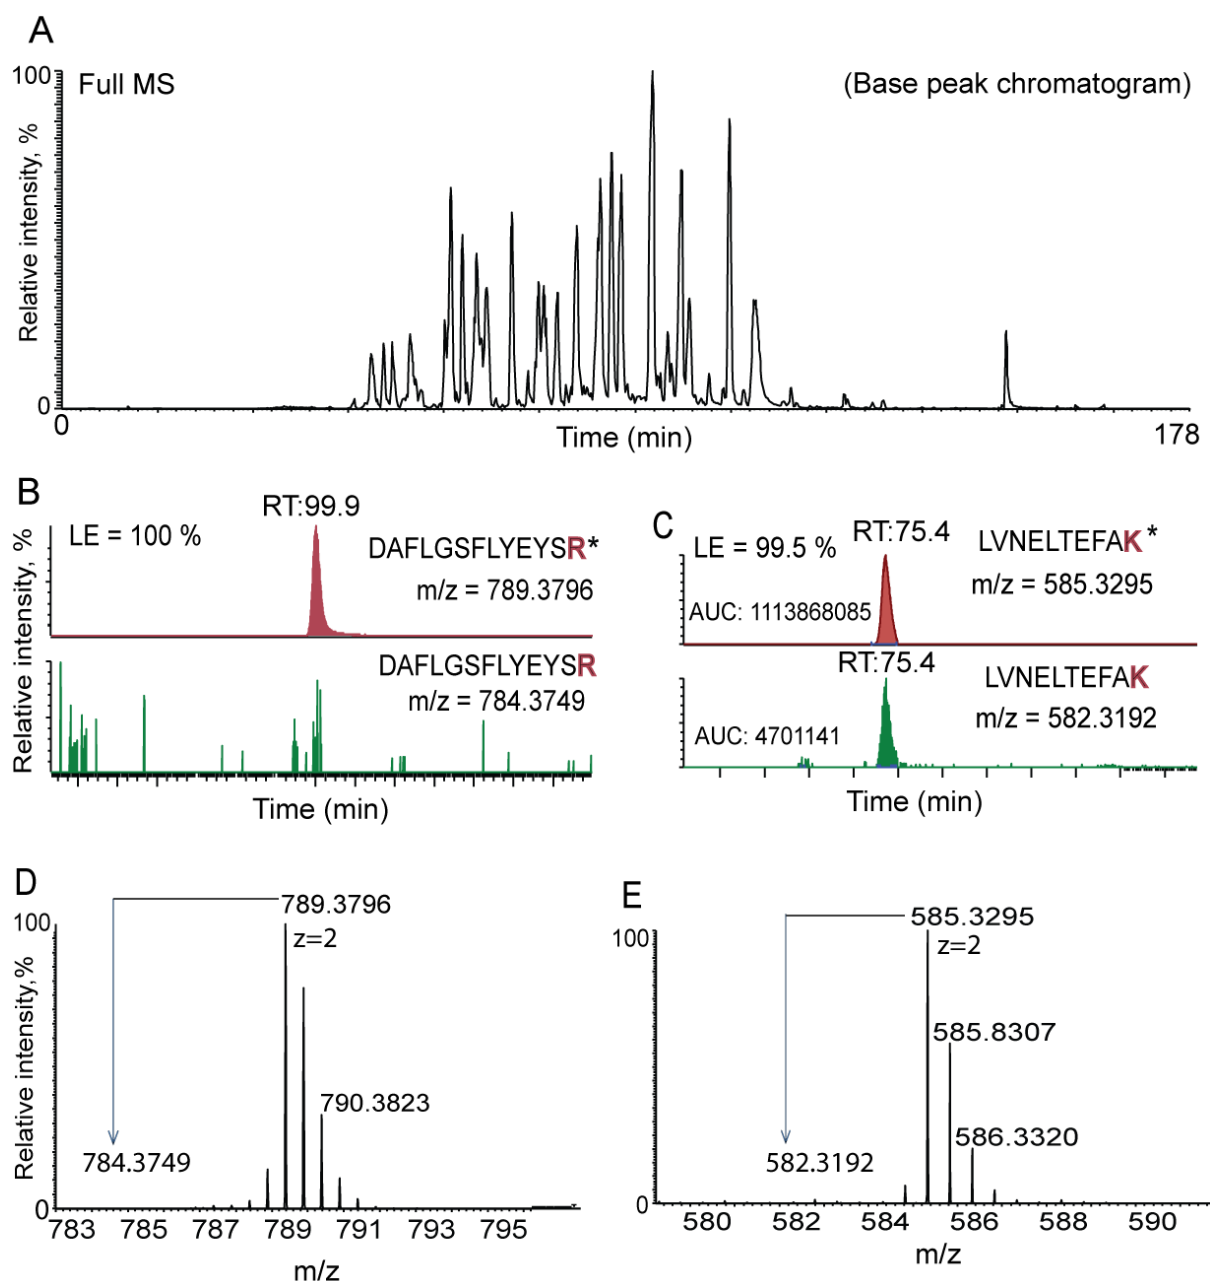

**Fig. S9:** Efficient incorporation of heavy isotope labelled Arginine ( $^{13}\text{C}_6$   $^{15}\text{N}_4$ -Arg) and Lysine ( $^{13}\text{C}_6$ -Lys) amino acids into a chimeric protein. **A**, shows the base peak chromatogram of full LC-MS/MS run of in-gel digested heavy isotope labelled chimeric protein CP01. **B**, shows the extracted ion chromatogram (XIC) of one of the arginine containing peptide pair: heavy\*(labelled) and light (unlabelled). As evident by the XICs, even the trace of unlabelled peptide was not detected (B, lower panel) confirming the labeling efficiency (LE) of ca 100%. Similarly, the LE of lysine was calculated and exemplified here with one of the lysine containing peptide in panel **C**, the LE of lysine was found to be 99.5%. The mass spectrum of heavy isotope labelled arginine and lysine containing peptide is shown in panel **D** and **E** respectively.

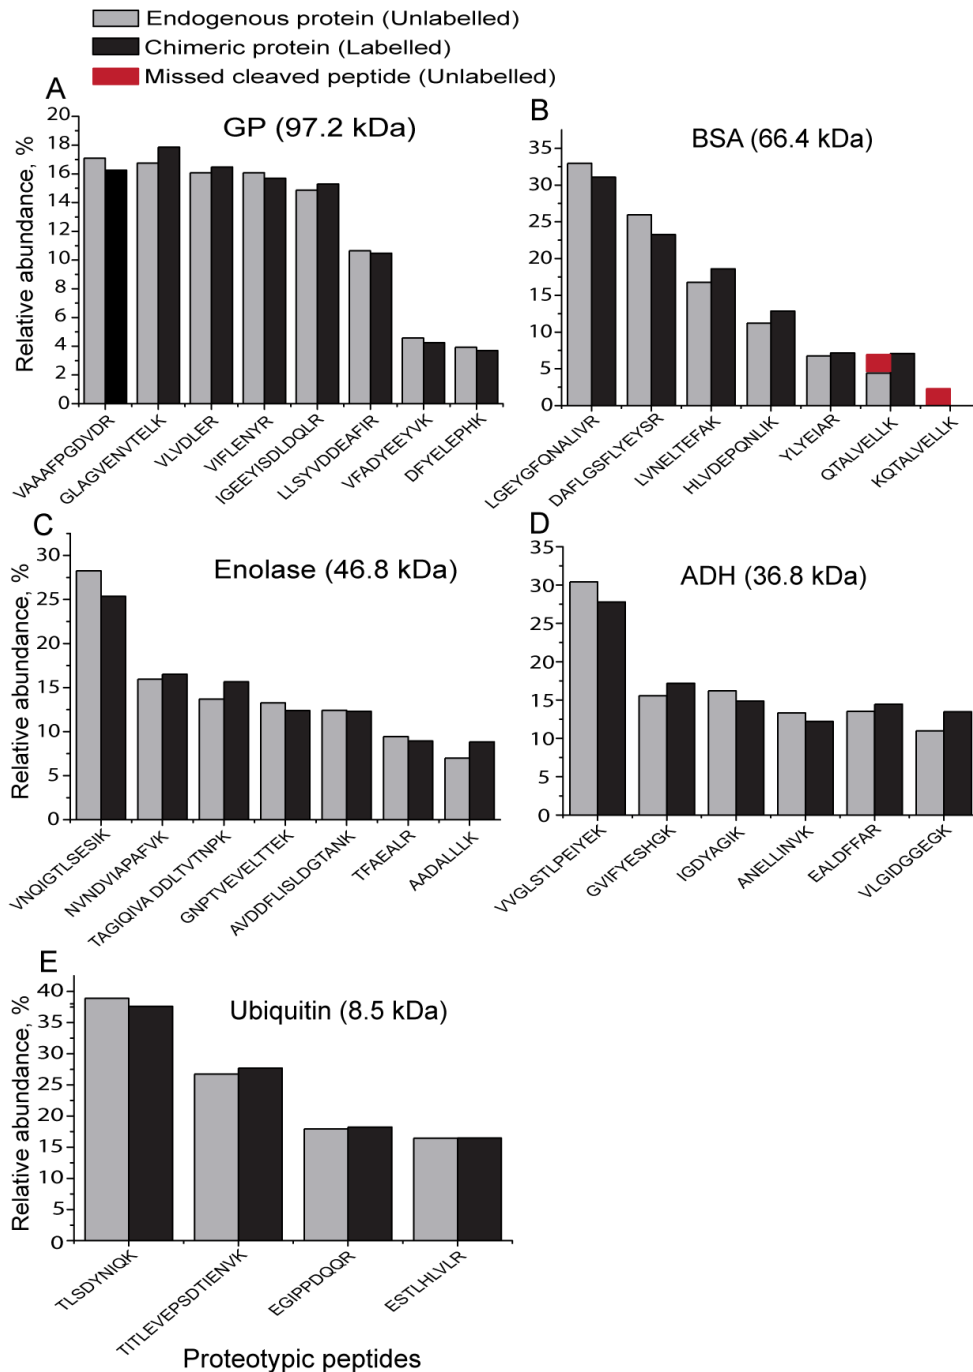

**Fig. S10:** Relative abundance of proteotypic peptides from endogenous and chimeric protein CP01. Isotopically labelled and unlabelled peptides were produced by in-gel co-digestion of CP01 and corresponding native proteins, respectively. The relative abundance of peptide pairs resulting from native full length and single CP01 differed by less than 10%. The abundance of a complementary peptide resulting from an incomplete cleavage of native BSA is highlighted in red.



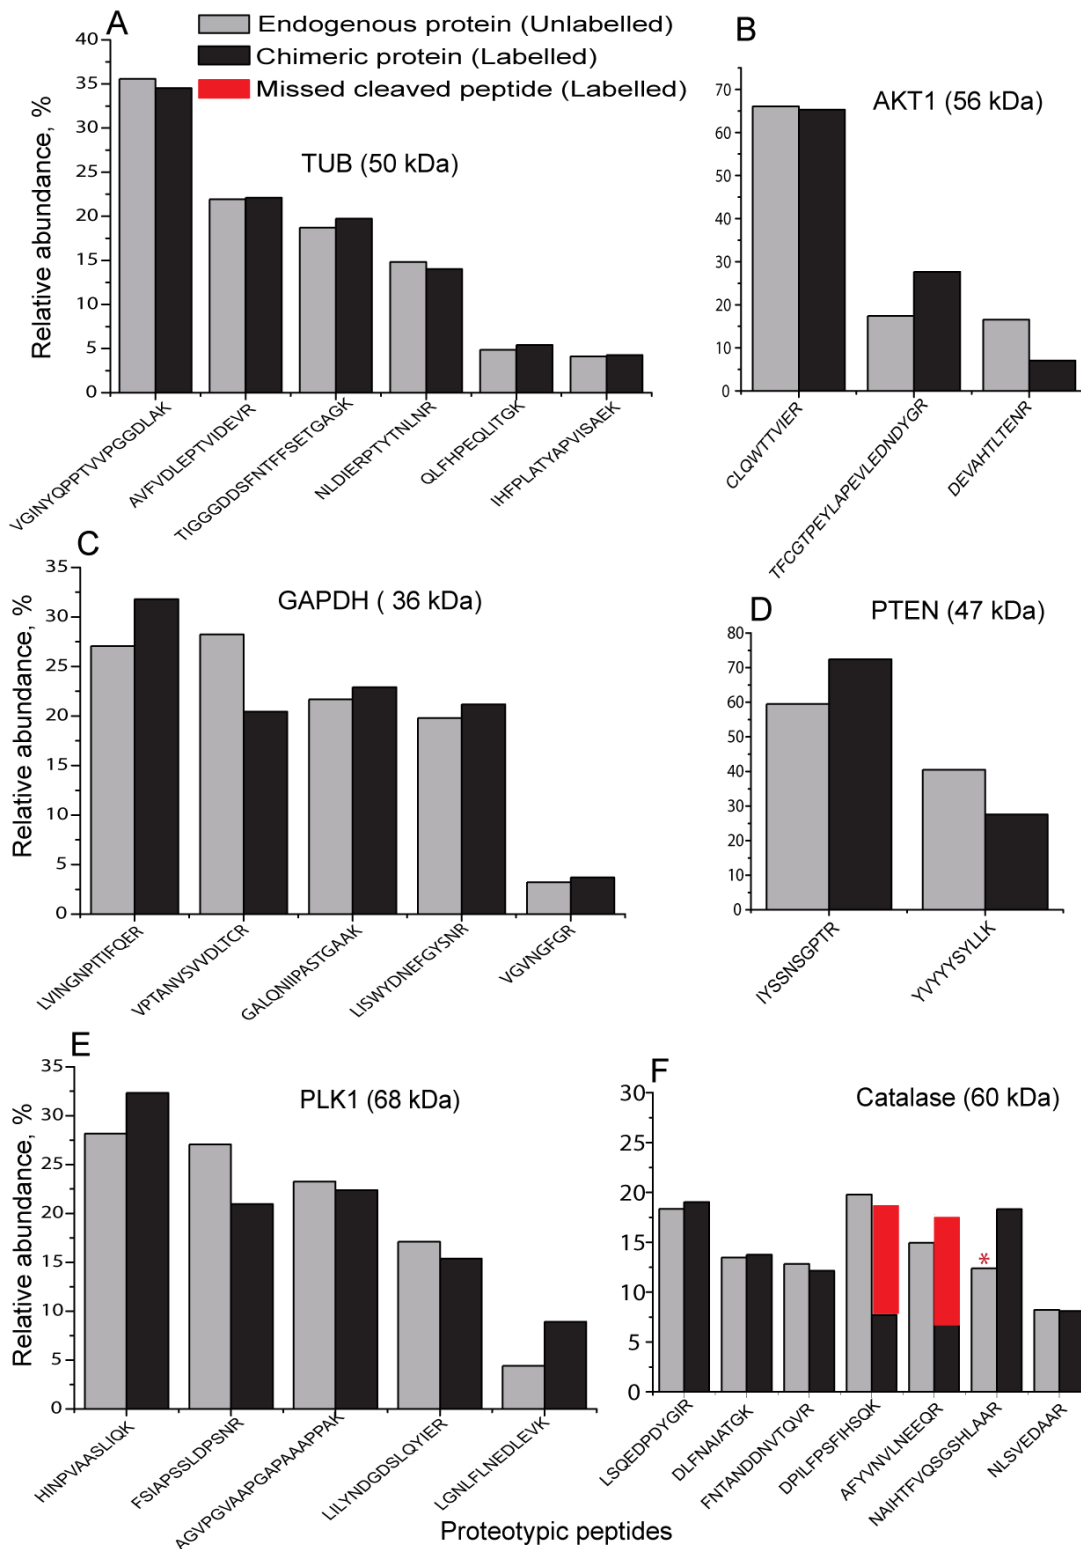

**Fig. S11:** Relative abundance of proteotypic peptides from endogenous and chimeric protein (CP03). The relative abundance of peptide pairs resulting from native full length and single CP03 differed by less than 10%. The abundance of “complementary” peptide resulting from incomplete cleavage of two of the catalase peptide is coloured. The peptide marked with (\*) is known to have phosphorylation (Mertins et al., 2013)

**Histone H4 Zebrafish (Uniprot accession # A4VAK6)**

MSGRGKGSKGLGKGGAKRHRKVLDRDNIQGITKPAIRRLARRGGVKRISGLIYEETRGVLKVF  
LENVIRDAVTYTEHAKRKTVTAMDVVYALKRQGRTLYGFGG

**Histone H4 Human, Recombinant (NEB Catalog # M2504S)**

SGRGKGGKGLGKGGAKRHRKVLDRDNIQGITKPAIRRLARRGGVKRISGLIYEETRGVLKVFL  
ENVIRDAVTYTEHAKRKTVTAMDVVYALKRQGRTLYGFGG

**Fig. S12:** Amino acid sequence of Histone H4 from Zebrafish and Human recombinant as supplied by NEB. Both these sequences share 99% identity.

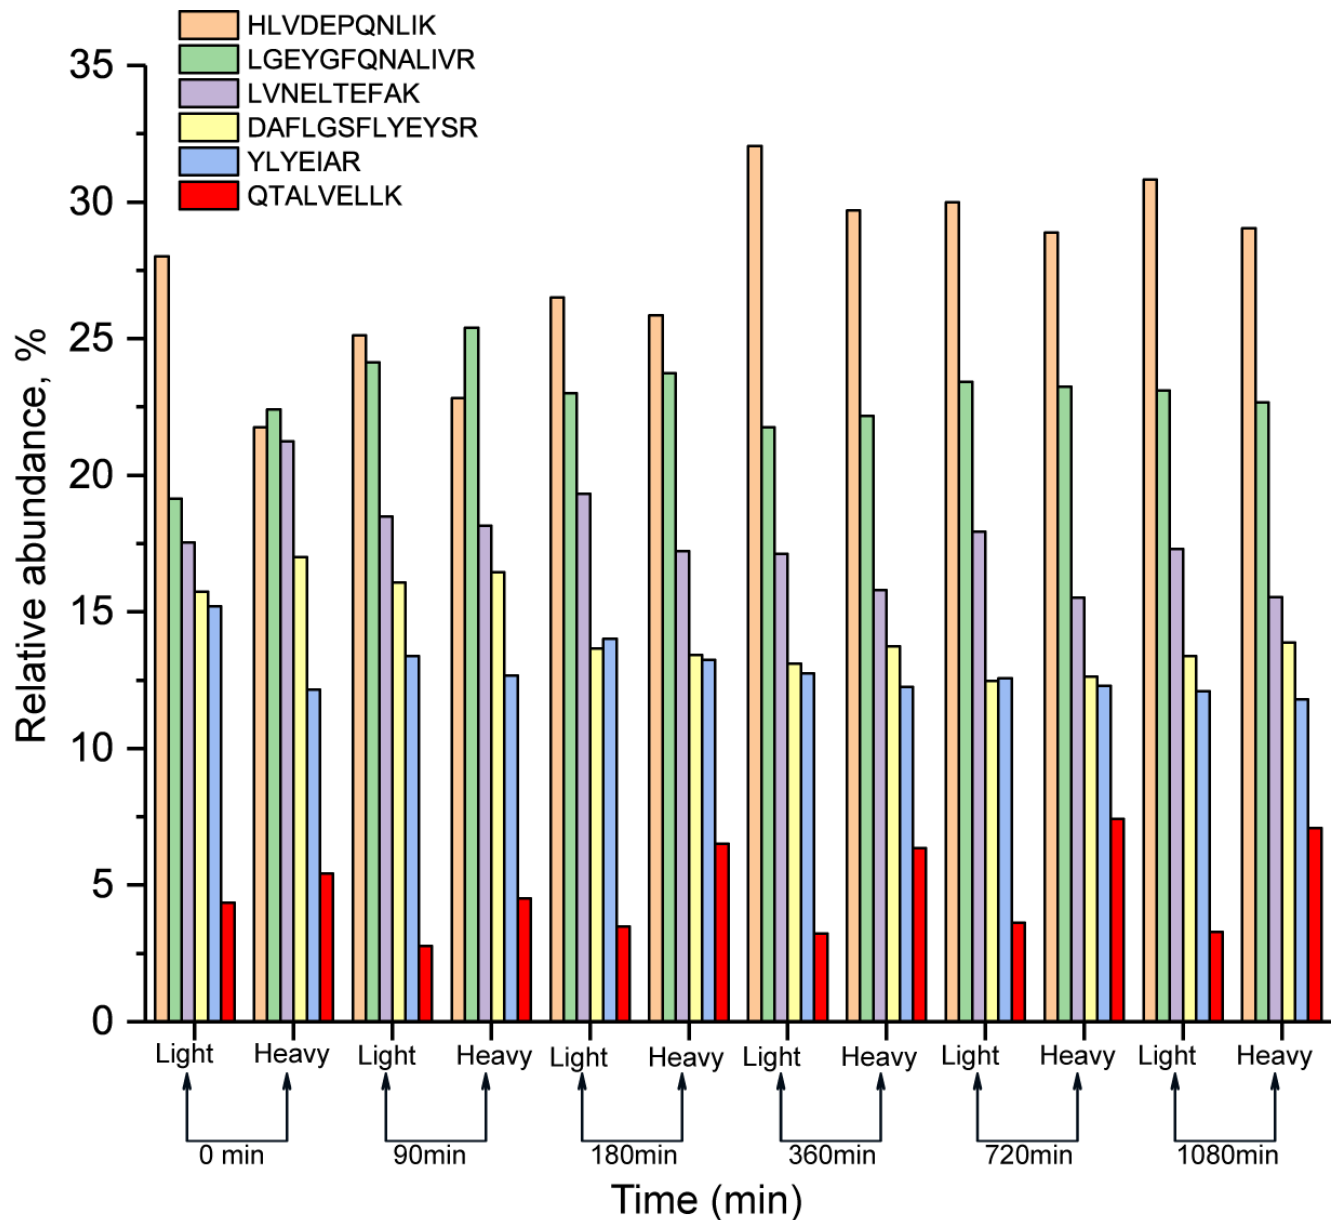

**Fig. S13:** Relative abundance of proteotypic peptides from full length BSA and chimeric protein CP03. The yield of unlabelled (light) and isotopically labelled (heavy) peptide pairs from full length BSA and CP03, respectively, at different digestion time point are shown. After 90 minutes of digestion, the relative abundance of all the light and heavy peptide pairs, except QTALVELLK, differed by less than 5%. Low abundance of light QTALVELLK compared to its heavy counterpart is due to missed cleavage (KQTALVELLK) owing to the presence of dibasic residue at the peptide N-terminus (KKQTALVELLK).

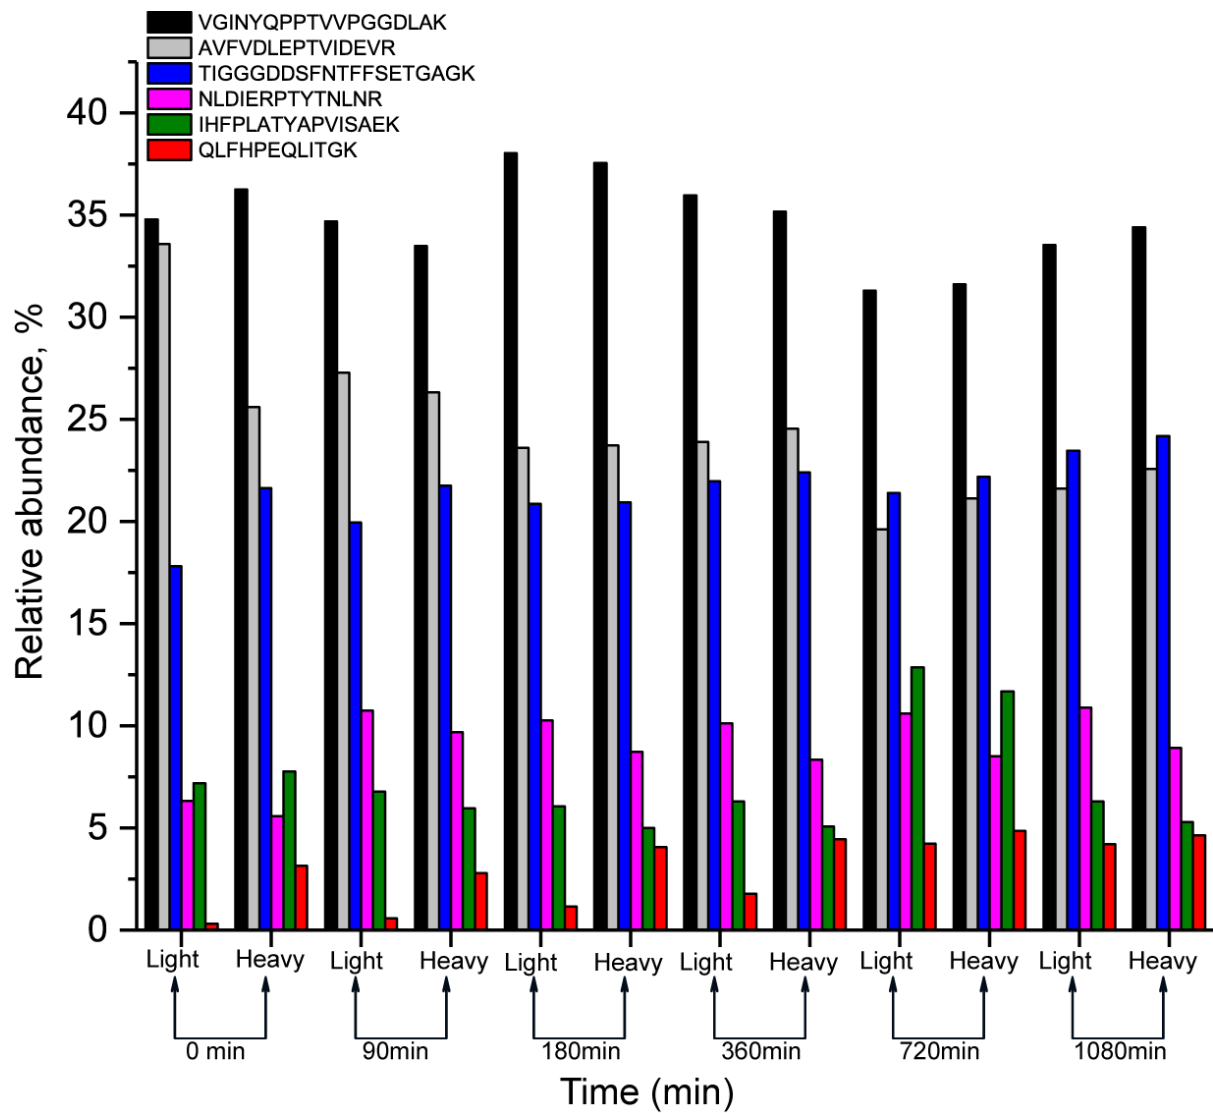

**Fig. S14:** Relative abundance of proteotypic peptides from endogenous  $\alpha$ -Tubulin (TUBA) and chimeric protein CP03. The yield of unlabelled (light) and isotopically labelled (heavy) peptide pairs from endogenous TUBA and CP03, respectively, at different digestion time point are shown. After 90 minutes of digestion, the relative abundance of all the light and heavy peptide pairs differed by less than 5%. Low abundance of light QLFHPEQLITGK compared to its heavy counterpart is due to slow release and after 12hrs of digestion the abundance of light QLFHPEQLITGK matched to its heavy counterparts.

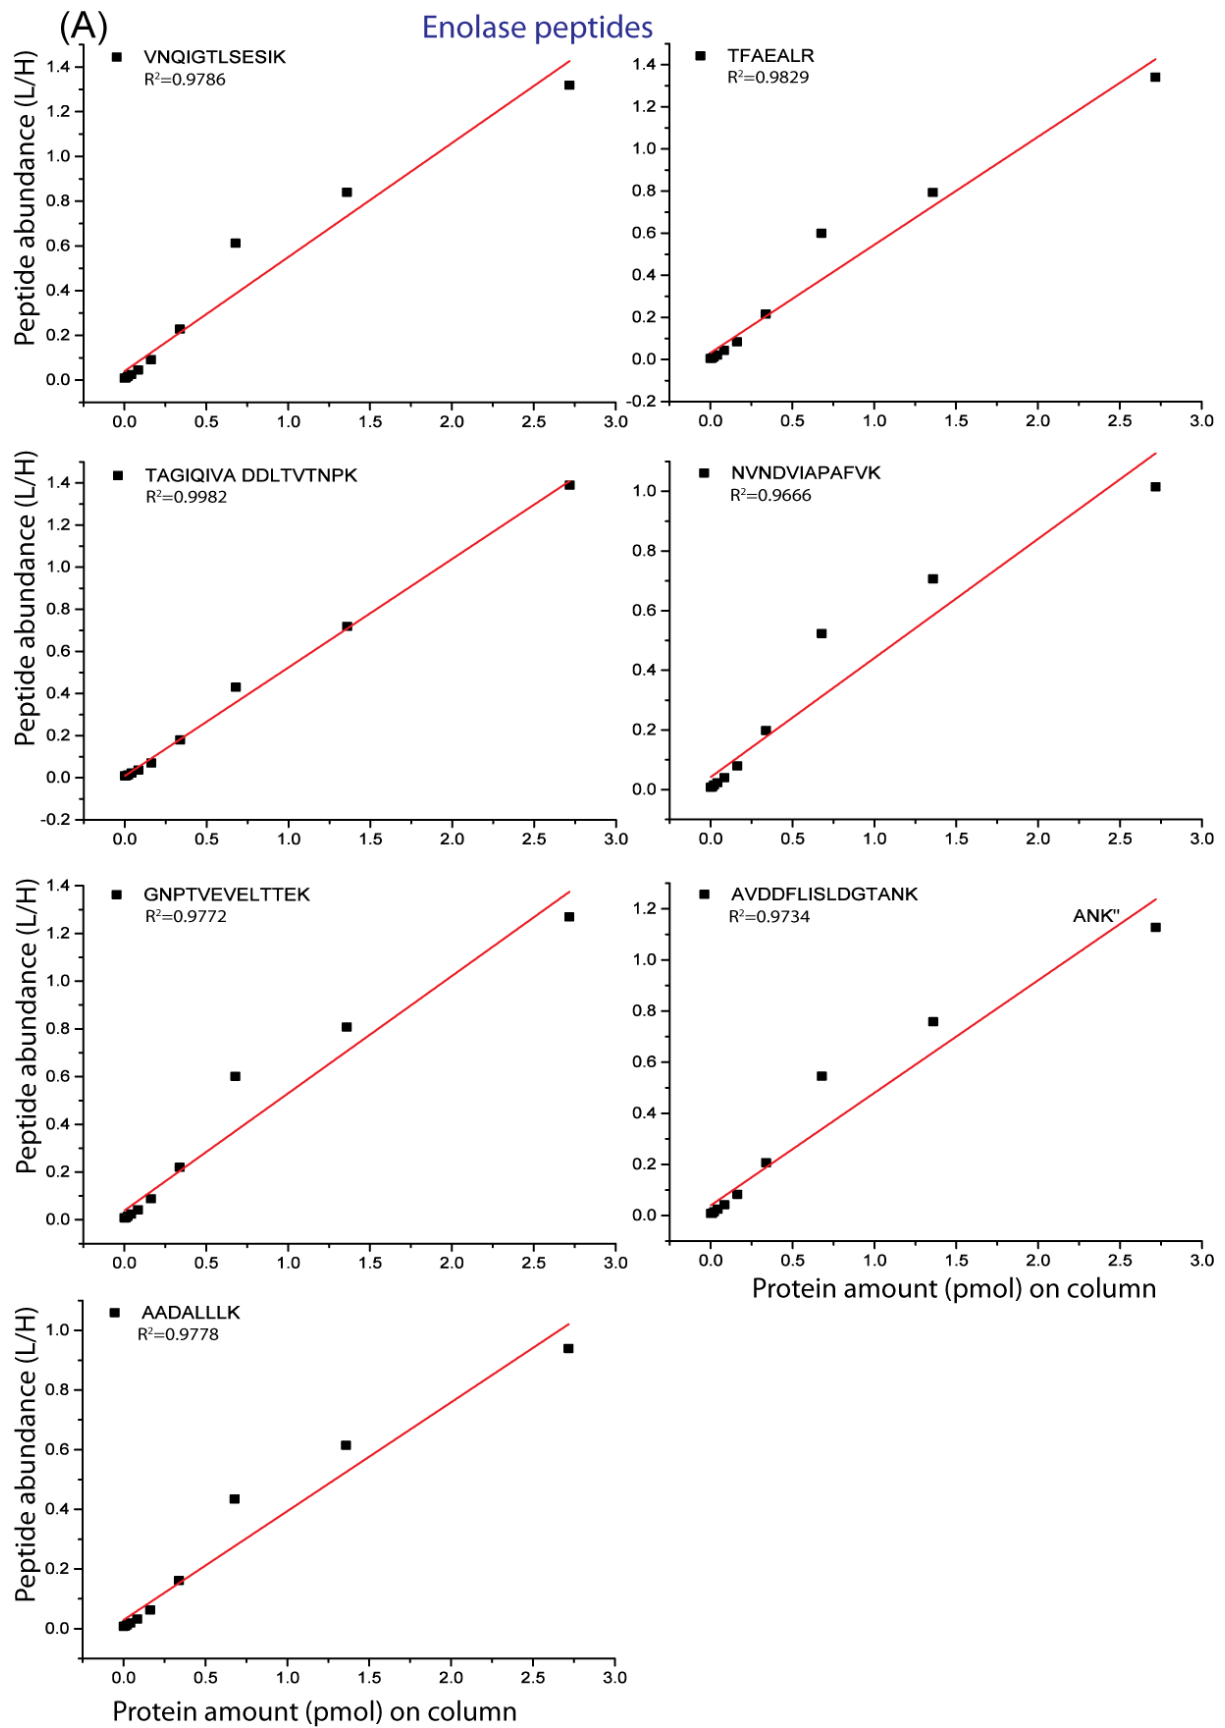

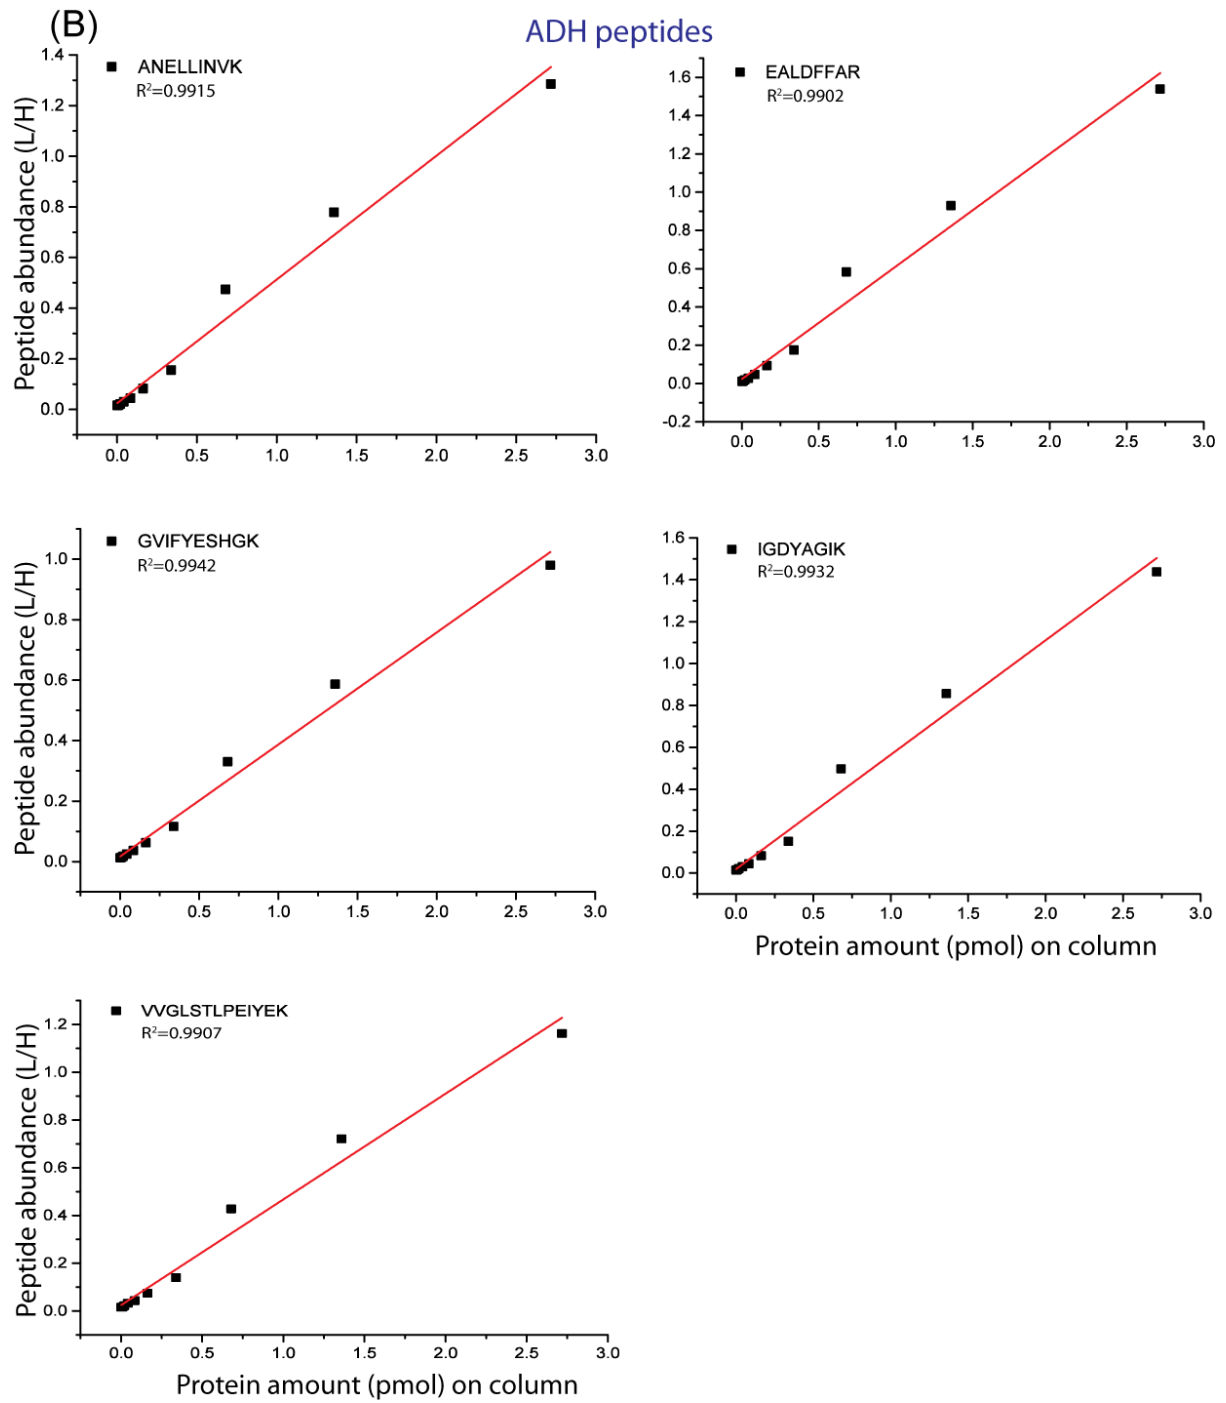

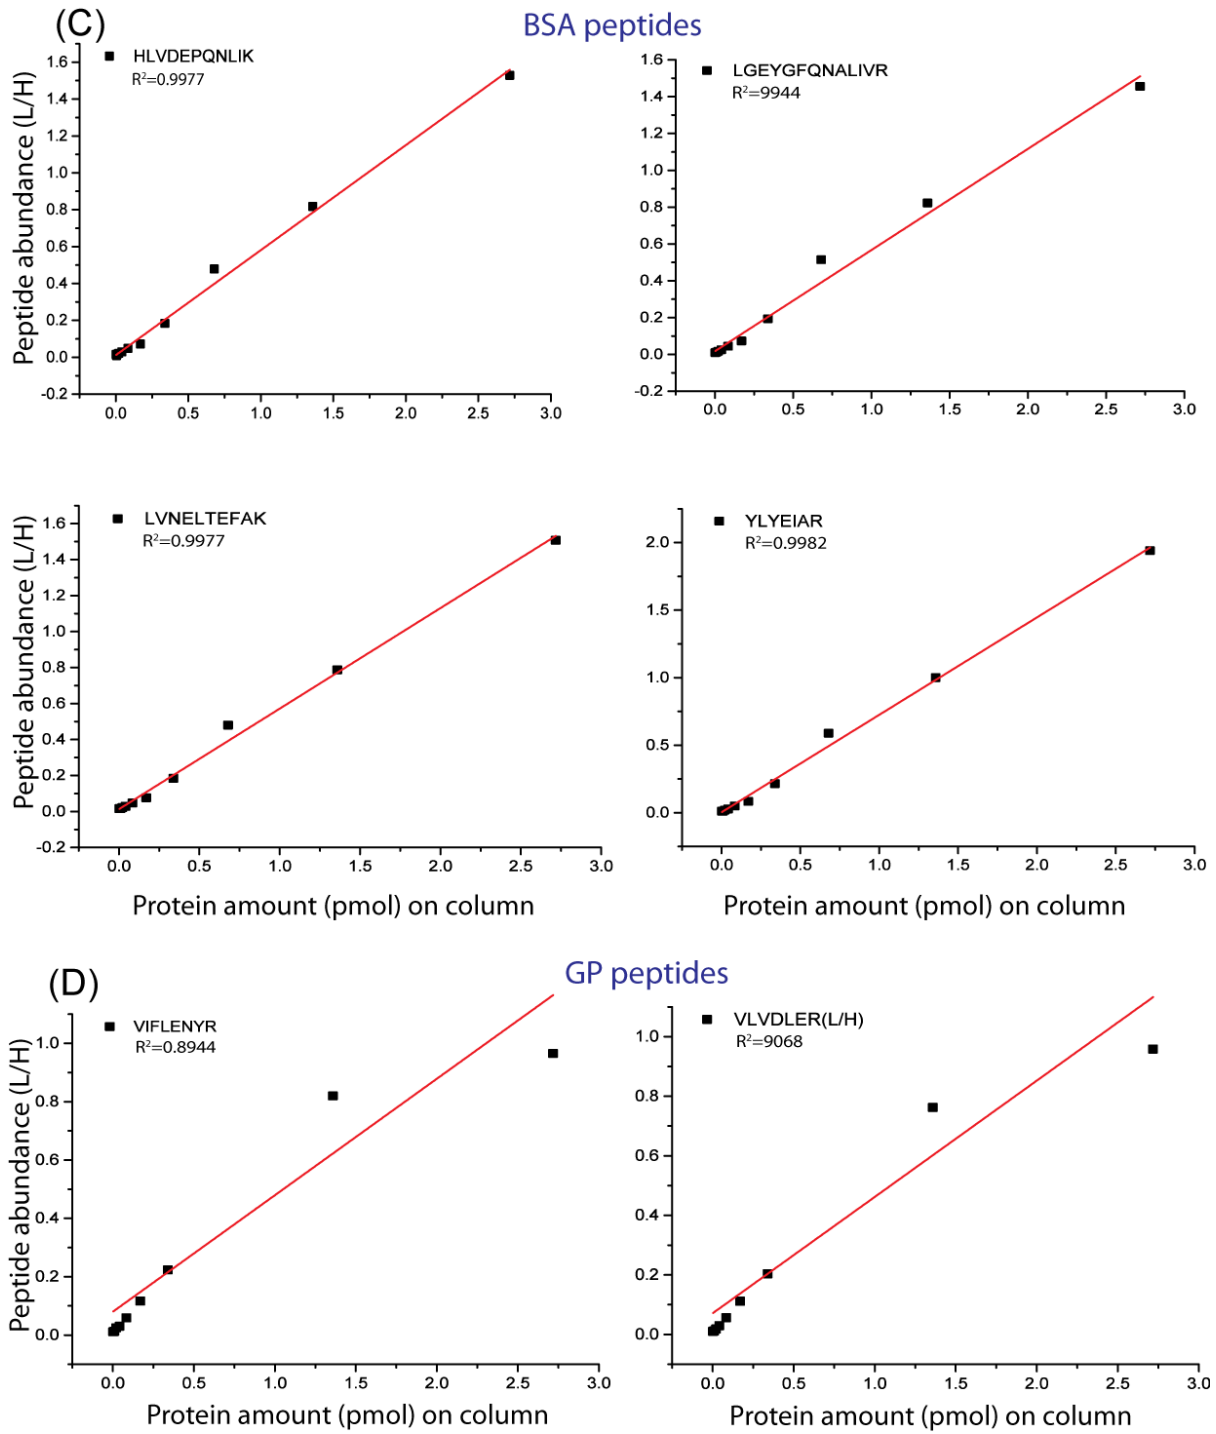

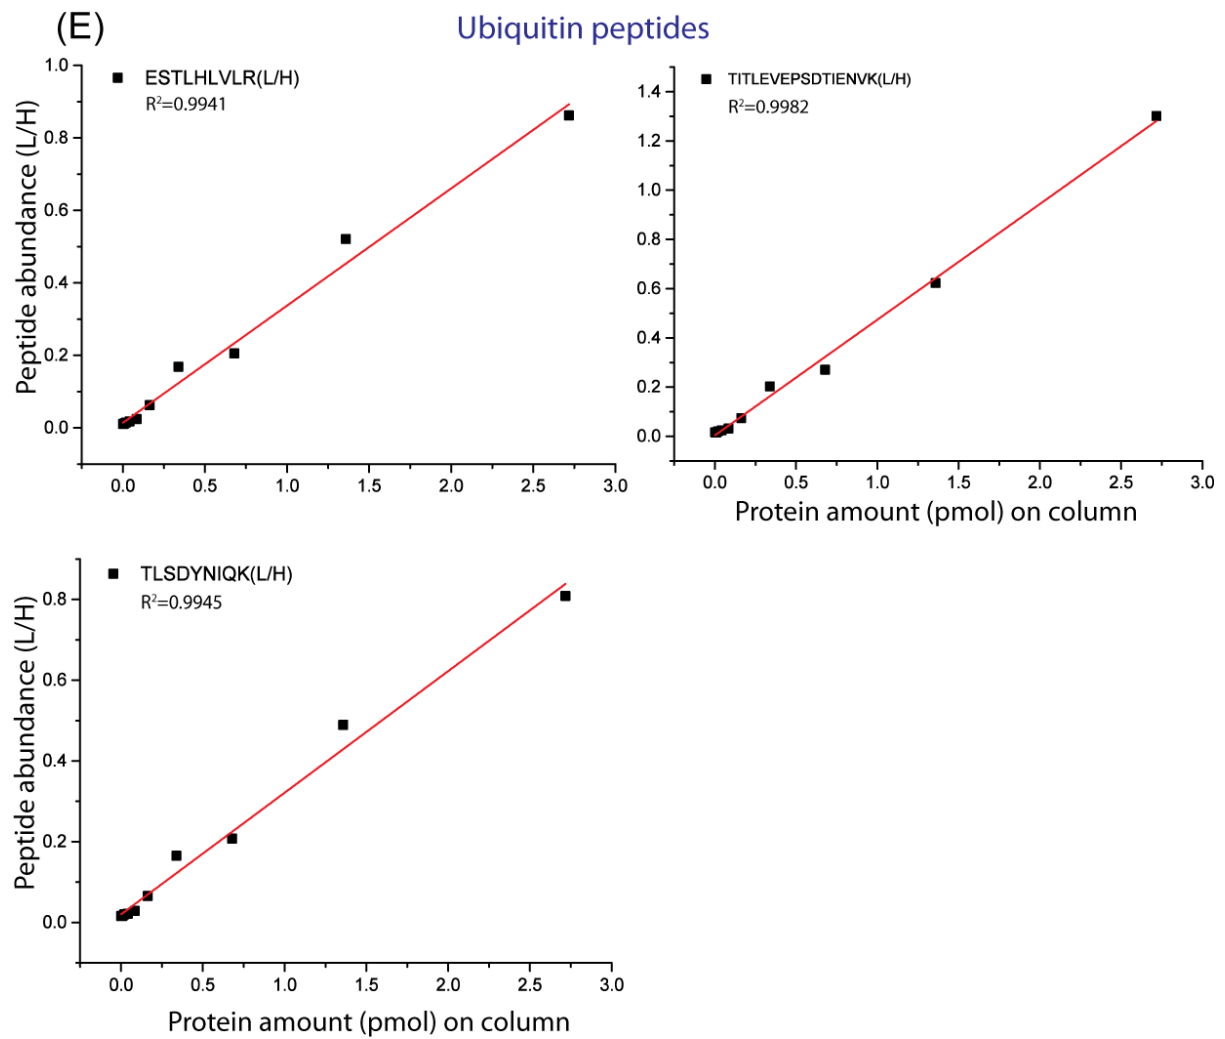

**Fig. S15:** MS Western quantification of proteins spiked into the constant background of E.coli lysate . **A-E**, respectively shows the quantification of Enolase, ADH, BSA, GP and UBI based on different peptides.



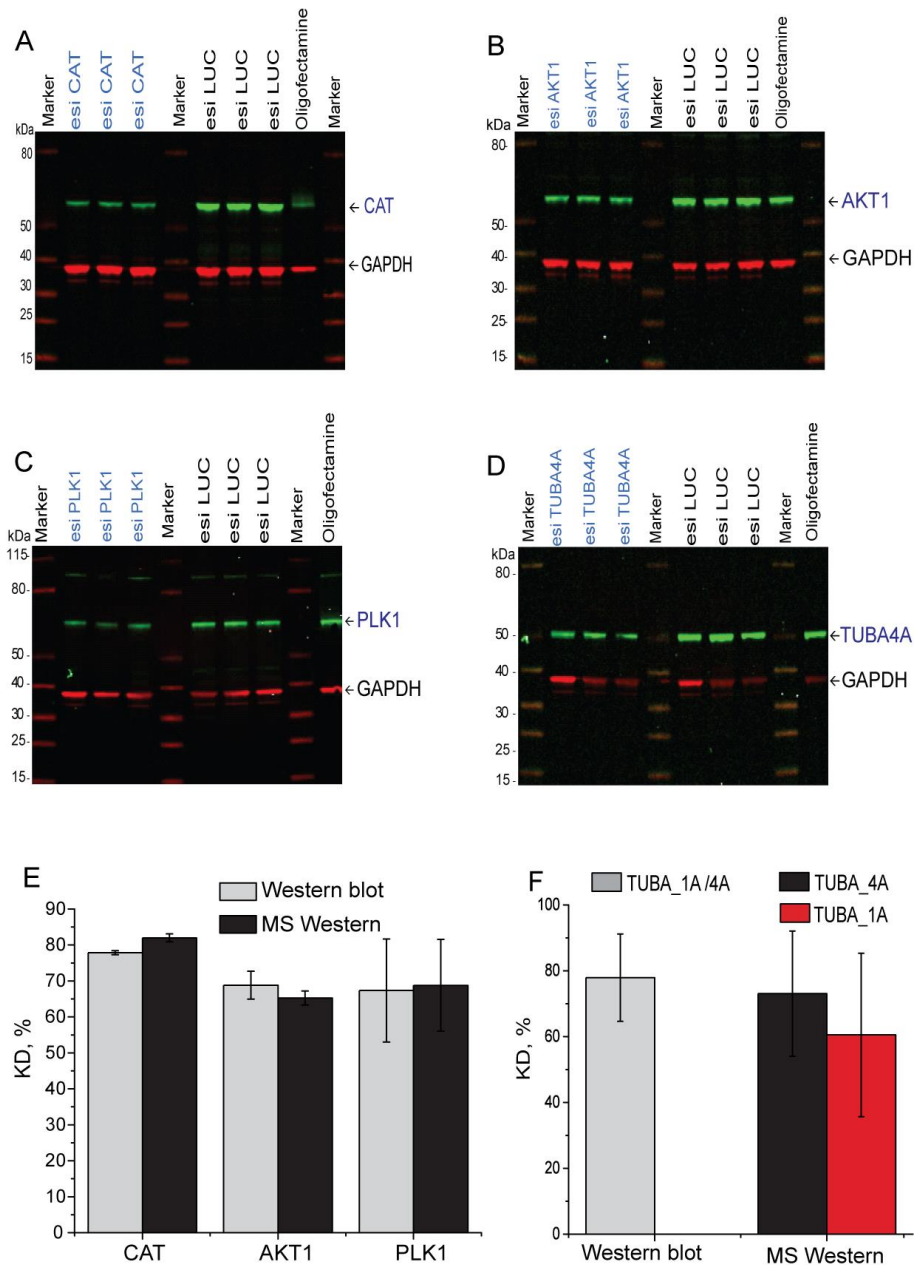

**Fig. S16:** Quantification by MS Western and Odyssey is quantitatively concordant.

**A-D**, the Odyssey images of total protein extract of HeLa cell subjected to RNAi. Knock-down (KD) experiments were performed in triplicate and compared against non-targeting luciferase esiRNA (esiLUC) control. **E**, KD efficiency by esiRNA against CAT, AKT1 and PLK1 proteins determined by MS Western and Odyssey. **F**, KD efficiency by esiRNA against TUBA4A determined by MS Western and Odyssey. MS Western recognized that TUBA1A, along with TUB4A, was also KD with the similar efficiency. In panels E and F values are mean  $\pm$ SD (n=3), where “n” represents number of biological replicates.

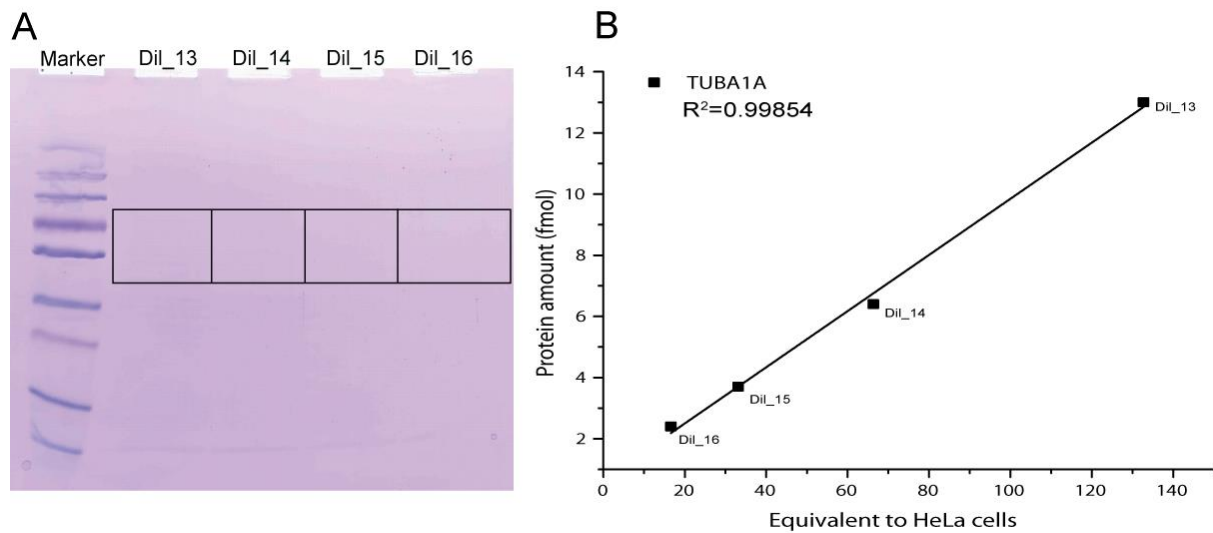

**Fig. S17:** Quantification of protein from the gel where nothing is visible. **A**, shows the electrophoresed 1D SDS PAGE gel loaded with serially diluted total protein extract from HeLa cells. The gel slice corresponding to the apparent molecular weight of  $\alpha$ -Tubulin (TUBA) were cut from different dilutions (marked with box) and codigested with BSA and CP01 gel band. **B**, shows the absolute quantification of TUBA1A from four different dilutions. The y-axis shows the amount (fmol) of TUBA1A quantified and the x-axis shows the corresponding equivalent amount of HeLa cells.

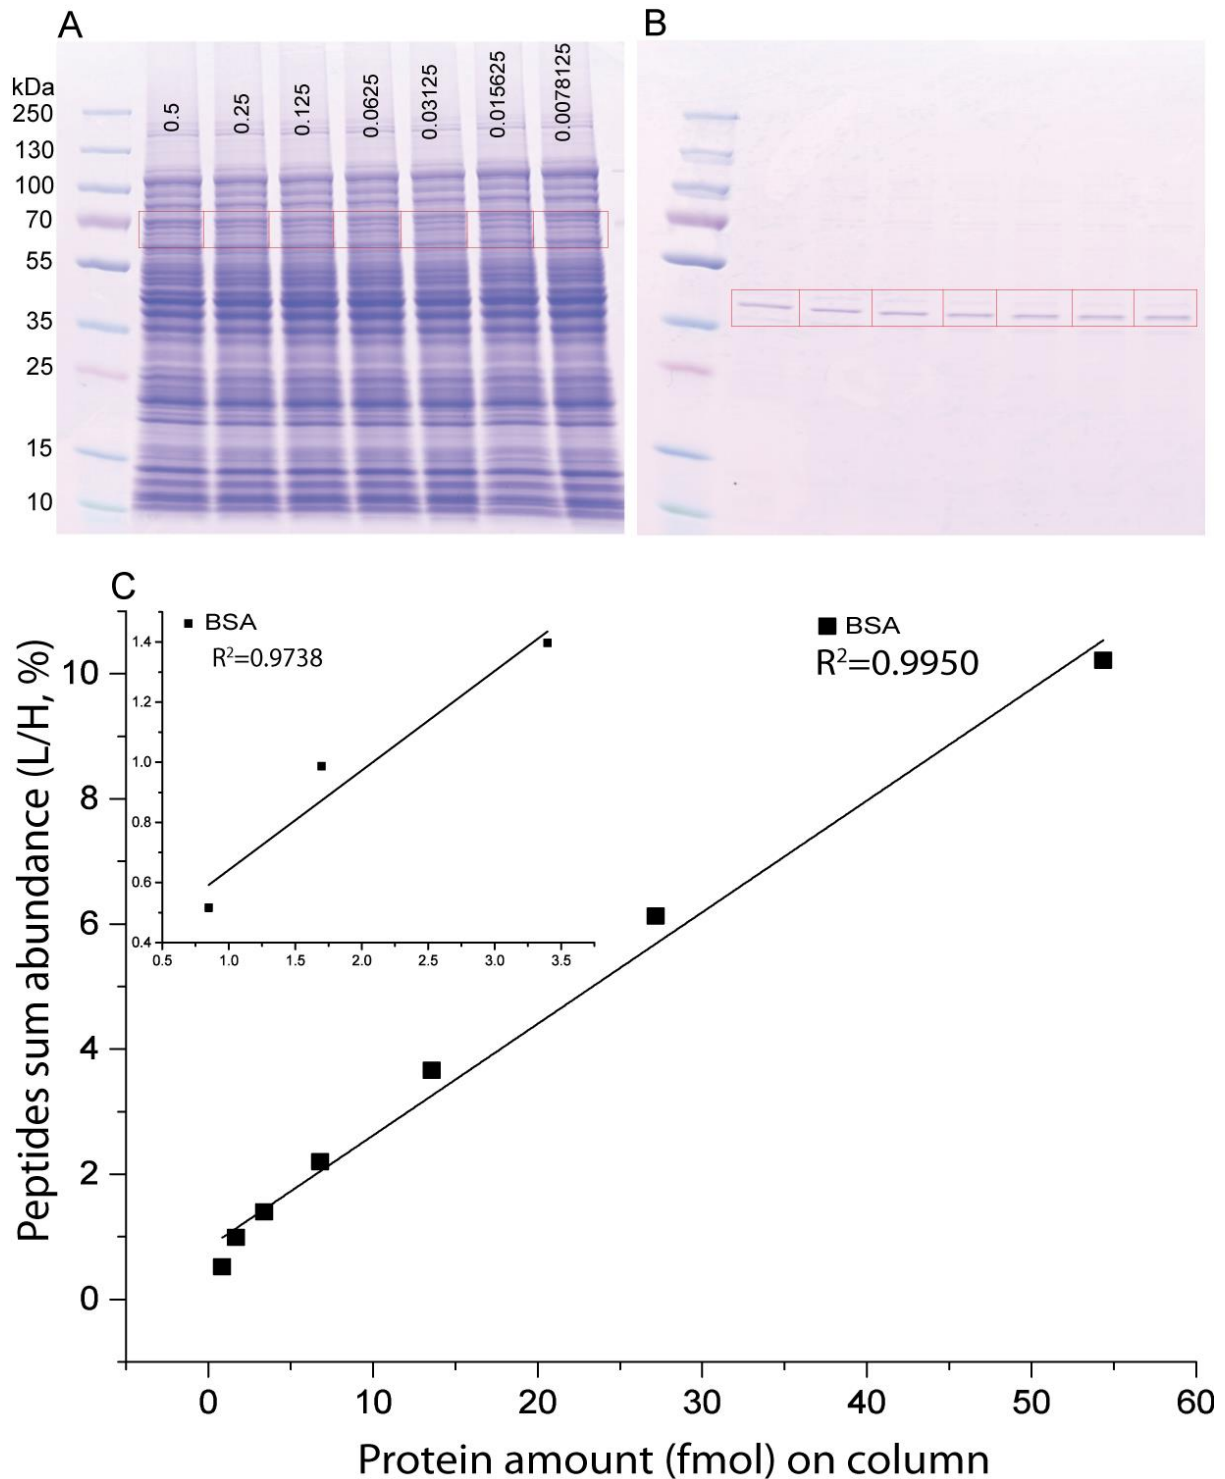

**Fig. S18:** Sub-femtomole quantification of protein spiked in large excess of complex background. **A**, shows the electrophoresed 1D SDS PAGE gel loaded with serially diluted BSA protein spiked in constant 50µg *E.coli* total protein extract. The pmol amount of BSA protein spiked in 50µg *E.coli* total protein extract loaded in each gel lane is indicated. **B**, shows the electrophoresed 1D SDS PAGE gel loaded with the heavy isotope labelled chimeric protein CP01 (same amount in all lanes). The gel slice corresponding to the apparent molecular weight of BSA were cut (gel A) from different dilutions (marked with colour box) and codigested with CP01 gel band (gel B) (marked with colour box). After in-gel digestion and extraction the peptides were recovered in 46µl of 5% aqueous formic acid and

5 $\mu$ l was injected on to the HPLC column and analysed by LC-MS/MS (only 10.8% of total protein amount loaded on the gel was injected into HPLC column). **C**, shows the calibration plot of serially diluted BSA. The y-axis shows the abundance of light BSA peptide (coming from serially diluted BSA) normalised to the corresponding heavy BSA peptide (coming from CP01). The x-axis shows the amount (fmol) of protein loaded on to the HPLC column. Inset to the pane C, shows the calibration plot of three lower dilutions at 0.8, 1.6 and 3.3fmol.

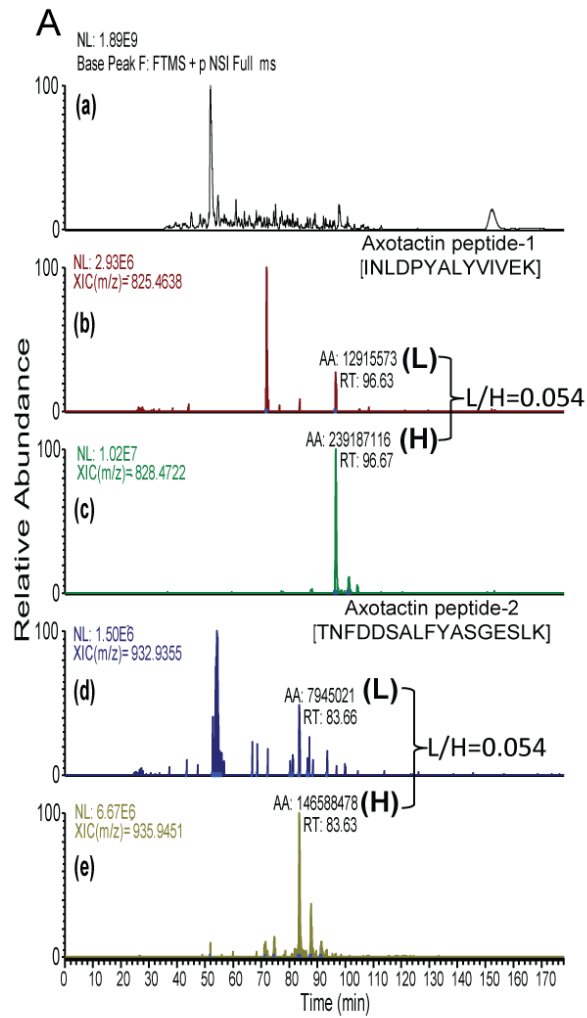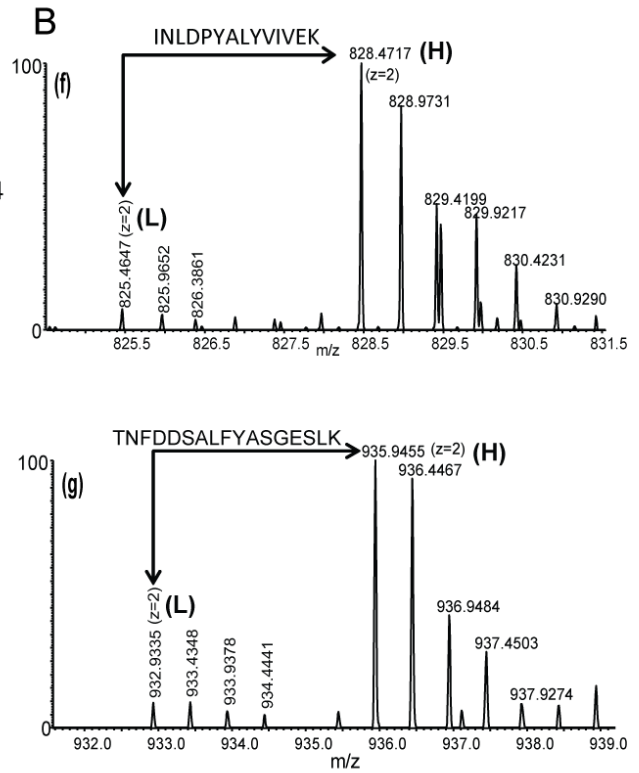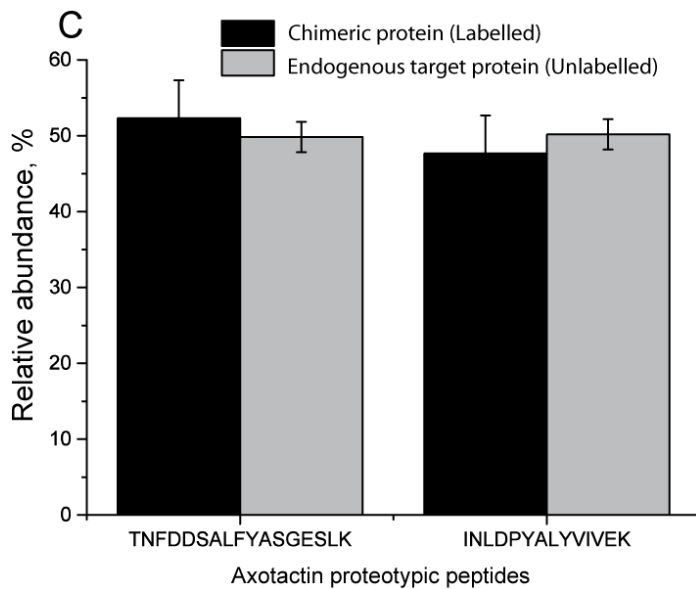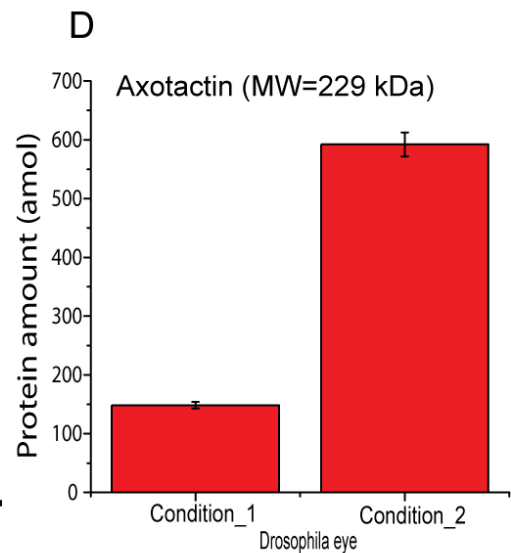

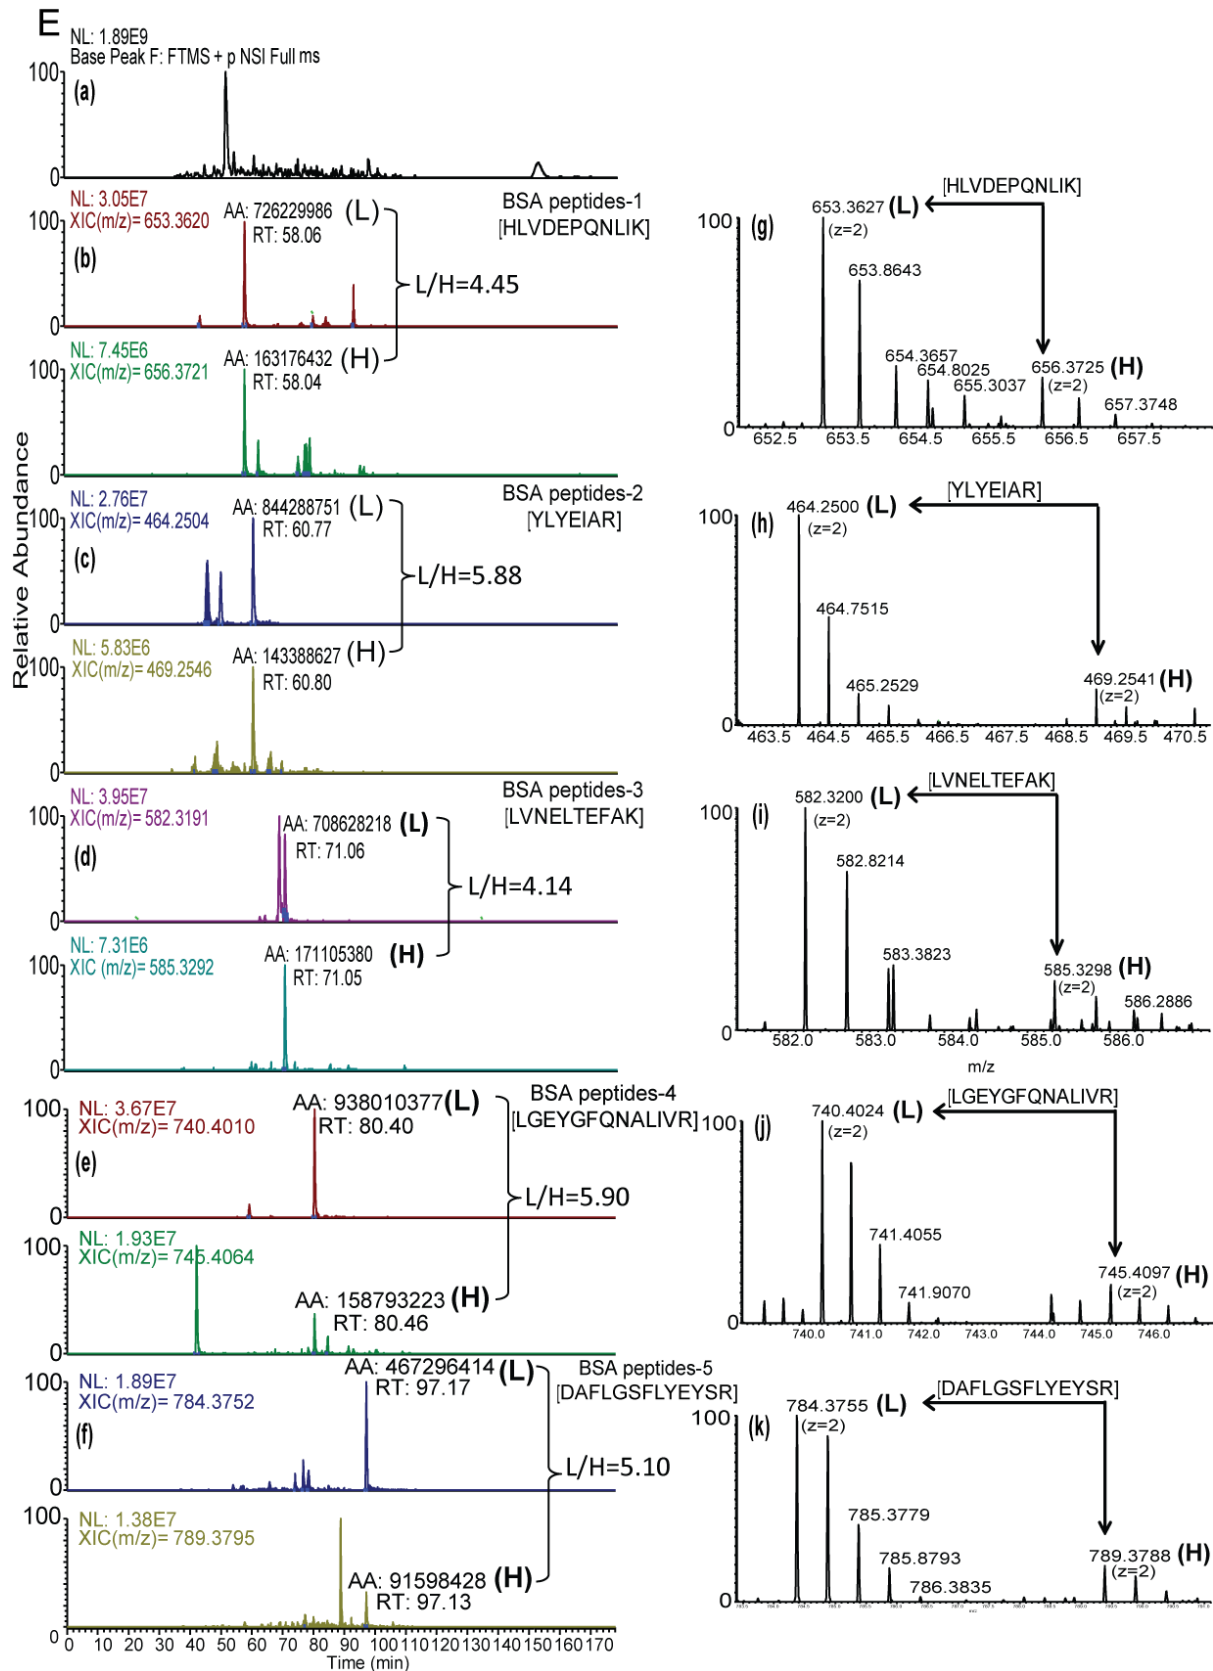

**Fig. S19:** Attomole quantification of axotactin protein from *Drosophila* eye. **A**, (a) shows the base peak chromatogram of full LC-MS/MS run of in-gel codigest of total protein extract of *Drosophila* eye, reference protein BSA and CP04. **(b-e)** shows the XICs of light (L) and heavy (H) peptide pairs of

two of the axotactin peptides of sequence INLDPYALYVIVEK and TNFDDSFALFYASGESLK at m/z 825.4627 (L), 828.4717(H) and 932.9331(L), 935.9446(H) respectively. **B**, (**f-g**) shows the corresponding mass spectrum of INLDPYALYVIVEK and TNFDDSFALFYASGESLK at m/z 825.4627 (L), 828.4717(H) and 932.9331(L), 935.9446(H) respectively. **C**, shows the relative abundance of heavy and light peptides yielding from CP04 and endogenous axotactin protein respectively. **D**, shows the attomole quantification of axotactin protein from the eye of *Drosophila* raised under two different conditions. Error bar indicates  $\pm$ SD (n=2) **E**, (**a**) shows the base peak chromatogram of full LC-MS/MS run of in-gel codigest of total protein extract of *Drosophila* eye, known amount of BSA and heavy isotope labelled chimeric protein CP04. (**b-f**) shows the XICs of light and heavy pairs of five BSA peptides and the corresponding mass spectra are shown in panel (**g-k**)

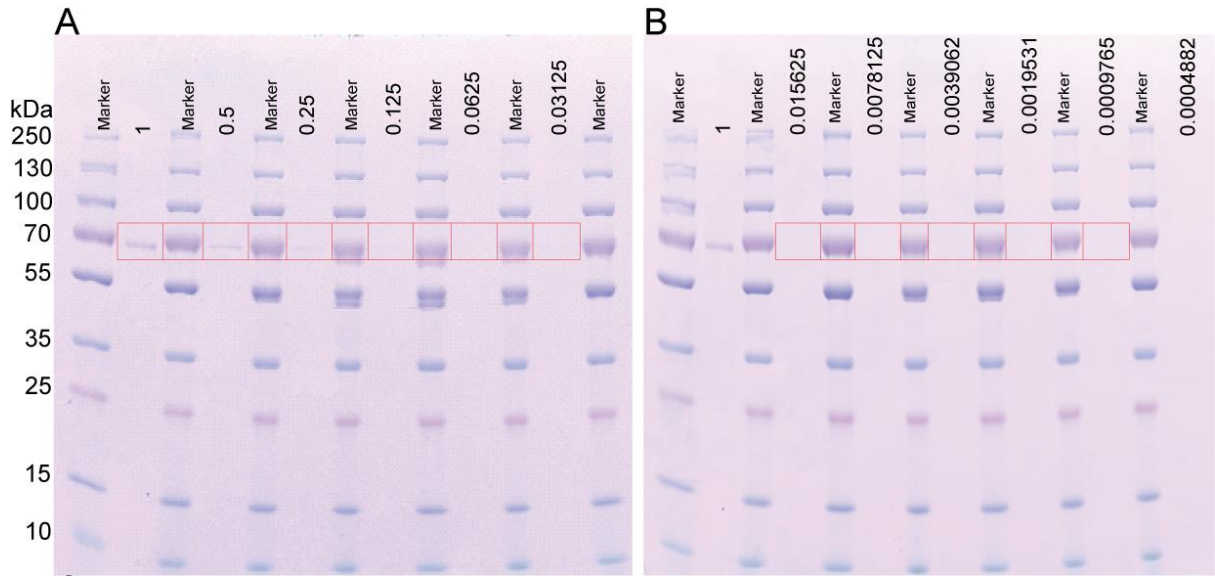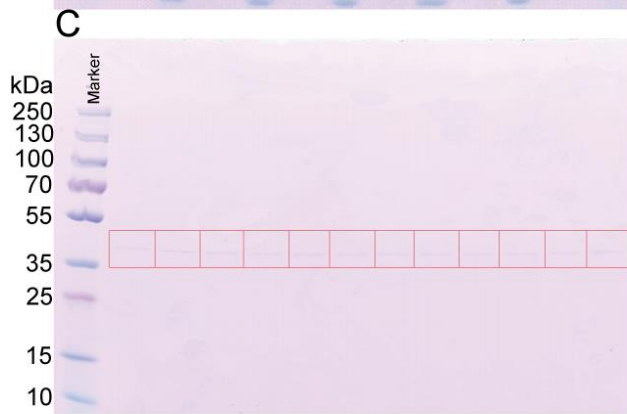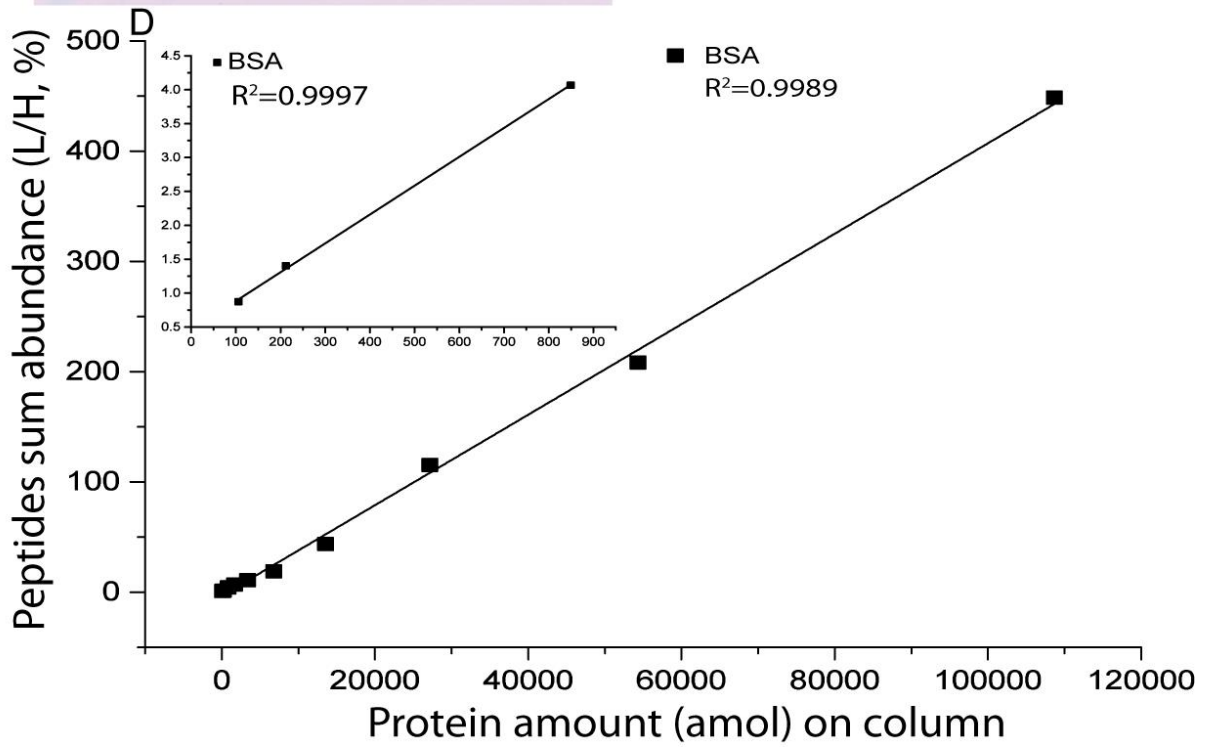



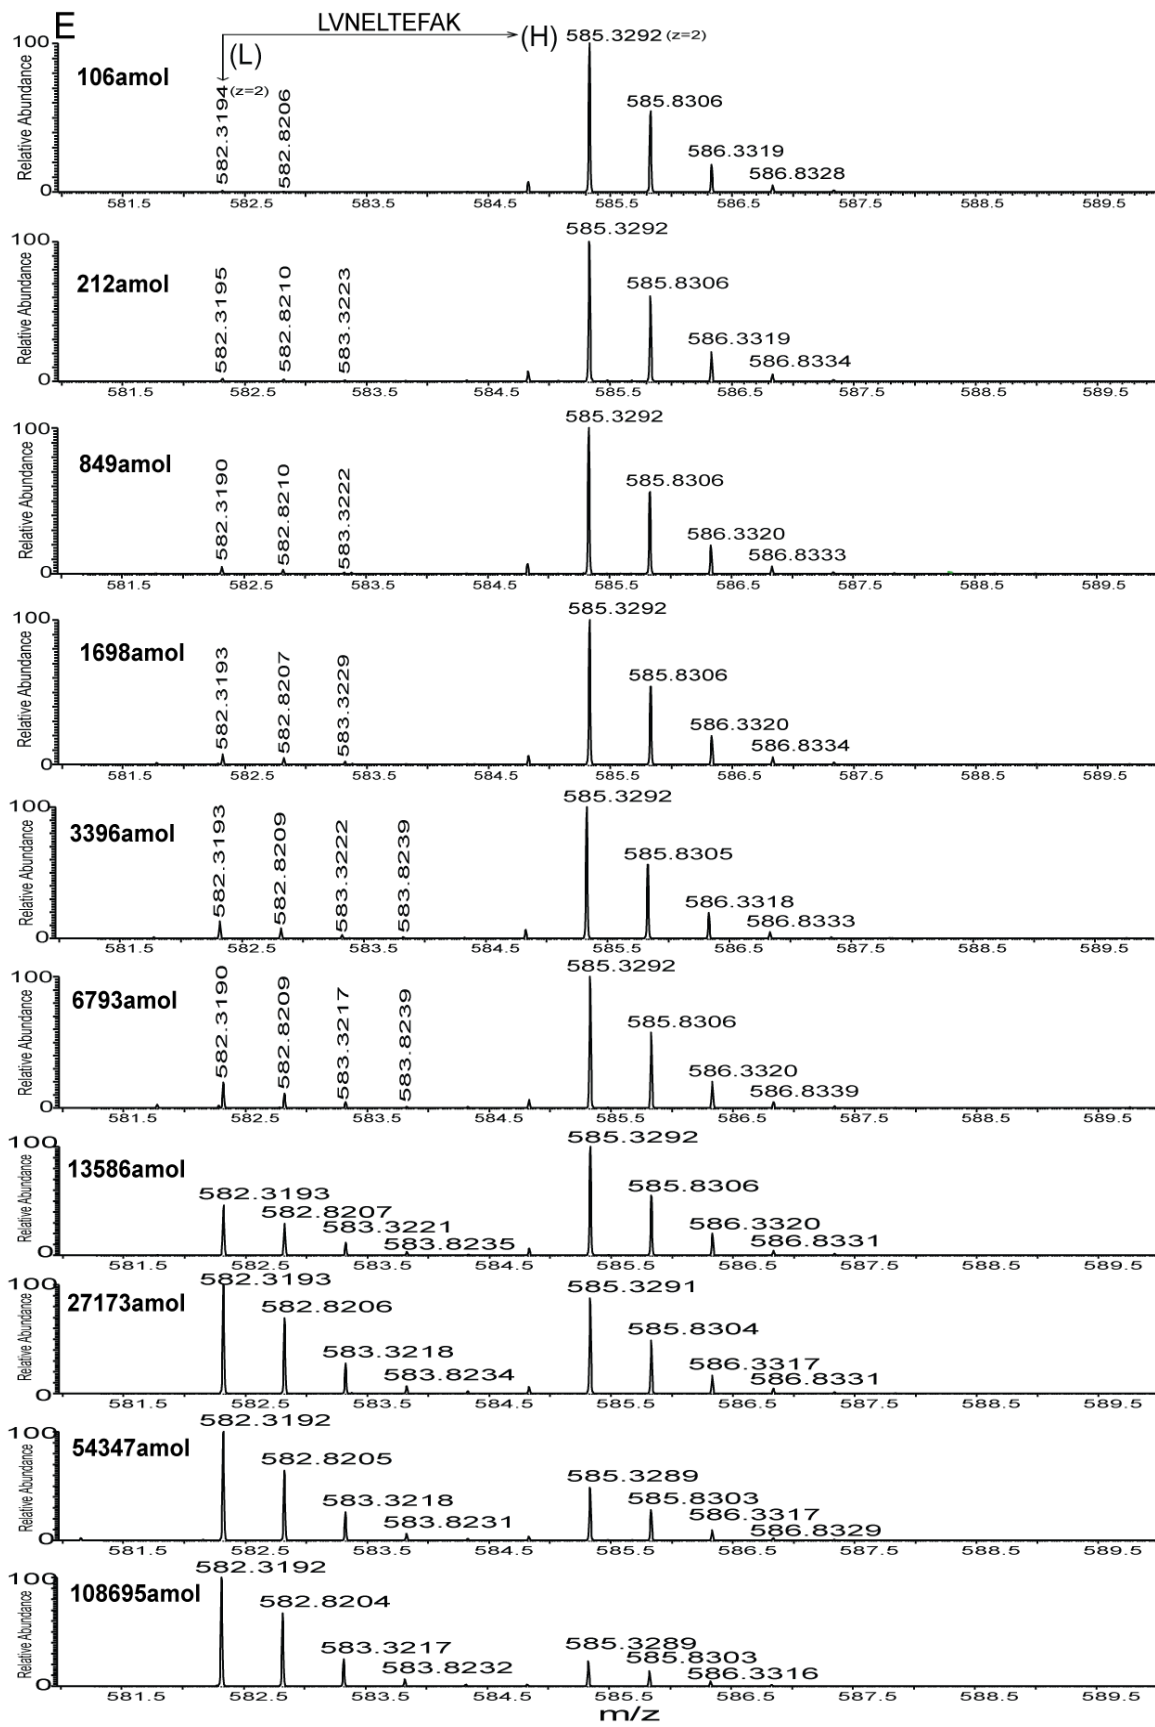

**Fig. S20:** Attomole quantification of protein. **A, B,** shows the electrophoresed 1D SDS PAGE gel loaded with serially diluted BSA protein. The pmol amount of protein loaded in each gel lane is

indicated. **C**, shows the electrophoresed 1D SDS PAGE gel loaded with the heavy isotope labelled chimeric protein CP01 (same amount in all lanes). The BSA gel band corresponding to different dilutions (gel A&B) were cut (marked with colour box) and codigested with CP01 gel band (gel C) (marked with colour box). After in-gel digestion and extraction the peptides were recovered in 46 $\mu$ l of 5% aqueous formic acid and 5 $\mu$ l was injected on to the HPLC column and analysed by LC-MS/MS (only 10.8% of total protein amount loaded on the gel was injected into HPLC column). **D**, shows the calibration plot of serially diluted BSA. The y-axis shows the abundance of light BSA peptide (coming from serially diluted BSA) normalised to the corresponding heavy BSA peptide (coming from CP01). The x-axis shows the amount (amol) of protein loaded on to the HPLC column. Inset to the pane D, shows the calibration plot of three lower dilutions at 106, 212 and 849amol. **E**, exemplify the mass spectra of light and heavy BSA peptide of sequence LVNELTEFAK at m/z 582.3190 and 585.3290 respectively. The masses were extracted using Xcalibur software with 5ppm mass tolerance.

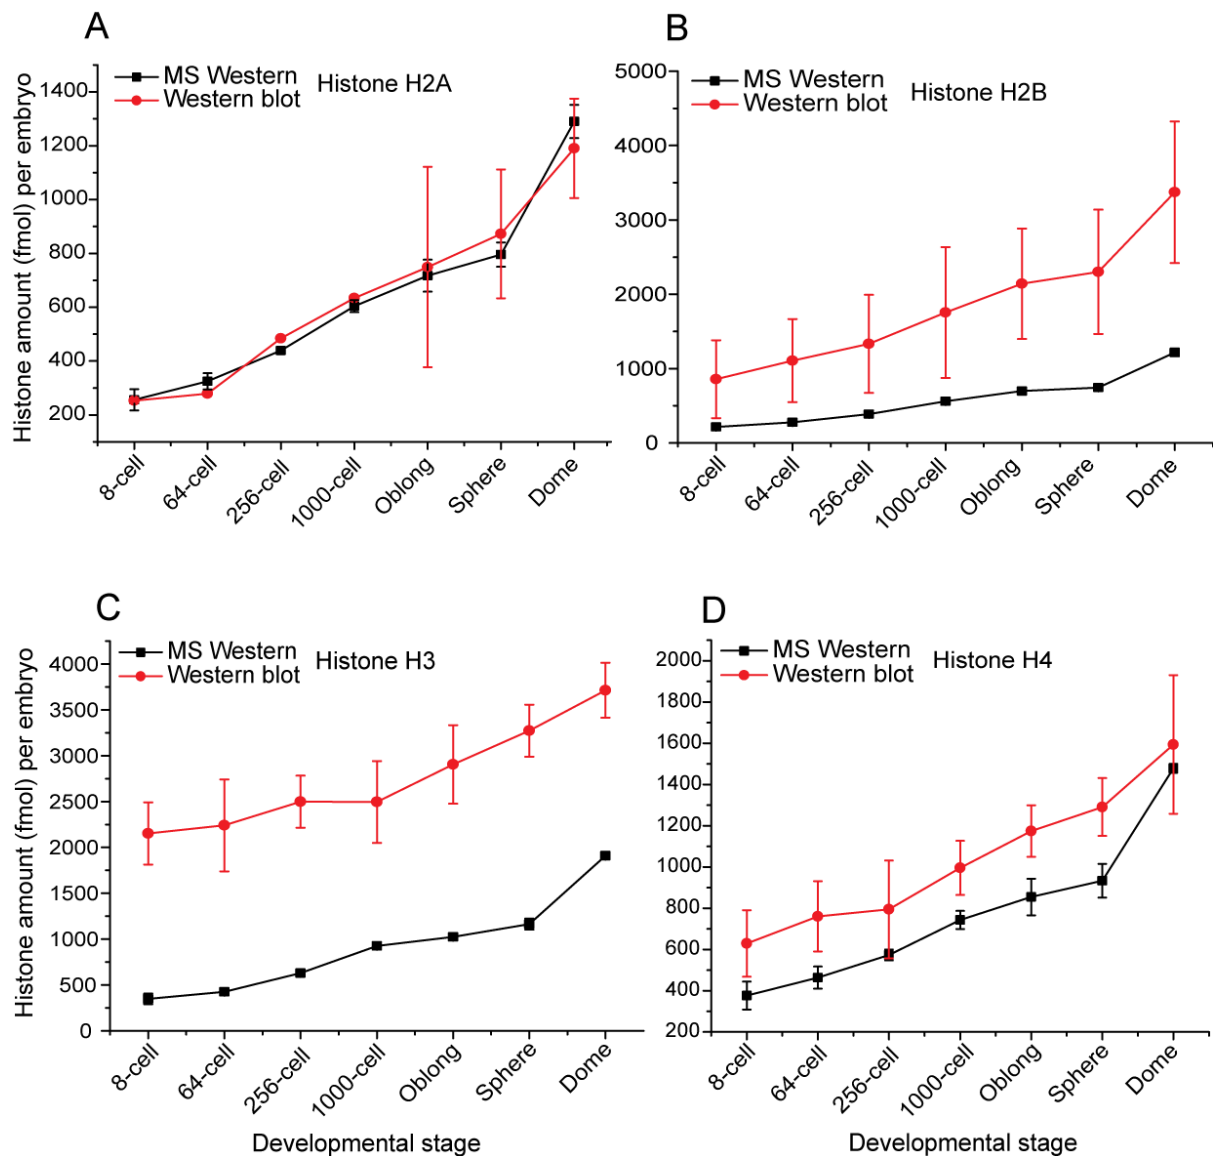

**Fig. S21:** Comparison of histone quantification by MS Western and by Western blot. The quantification of histone molecules from different developmental stages of zebrafish embryo was carried out by MS Western and Western blot (Li-COR Odyssey system). **A**, The number of histone H2A per embryo determined by MS Western and Western blot fits very well. **B and D**, the number of histone H2B and H4 per embryo determined by MS Western and Western blot is generally matching. **C**, the number of histone H3 per embryo determined by MS Western and Western blot did not match. The western blot reports higher number of molecules compared to MS Western. The values are mean  $\pm$ SD ( $n=3$ ), where “ $n$ ” represents number of biological replicates.

## Supplementary Tables

**Table S1:** Target proteins and corresponding proteotypic peptides selected for chimeric protein CP01.

| S.No      | Protein UniProt accession number | Protein Name (Gene Name)                   | Peptide sequence | $[M+2H]^2$<br>$m/z^+$ |
|-----------|----------------------------------|--------------------------------------------|------------------|-----------------------|
| 1.        | P00489<br>(PYGM_RABIT)           | Glycogen phosphorylase, muscle form (PYGM) | GLAGVENVTELK     | 615.3408              |
|           |                                  |                                            | VLVDLER          | 422.2505              |
|           |                                  |                                            | VAAAFPGDVDR      | 559.2859              |
|           |                                  |                                            | IGEEYISDLDQLR    | 775.8889              |
|           |                                  |                                            | LLSYVDDEAFIR     | 720.8722              |
|           |                                  |                                            | VIFLENYR         | 527.2903              |
|           |                                  |                                            | VFADYEEYVK       | 631.8024              |
| DFYELEPHK | 589.2796                         |                                            |                  |                       |
| 2.        | P02769<br>(ALBU_BOVIN)           | Bovine Serum Albumin (ALB)                 | LVNELTEFAK       | 582.319               |
|           |                                  |                                            | YLYEIAR          | 464.2505              |
|           |                                  |                                            | DAFLGSFLYEYSR    | 784.3771              |
|           |                                  |                                            | HLVDEPQNLIK      | 653.3619              |
|           |                                  |                                            | LGEYGFQNALIVR    | 740.4016              |
|           |                                  |                                            | QTALVELLK        | 507.8128              |
| 3.        | P00924<br>(ENO1_YEAST)           | Enolase 1 (ENO1)                           | GNPTVEVELTTEK    | 708.8649              |
|           |                                  |                                            | NVNDVIAPAFVK     | 643.8589              |
|           |                                  |                                            | AVDDFLISLDGTANK  | 789.9055              |
|           |                                  |                                            | TFAEALR          | 404.2218              |
|           |                                  |                                            | TAGIQIVADDLTVTNP | 878.478               |
|           |                                  |                                            | AADALLK          | 407.7553              |
|           |                                  |                                            | VNQIGTLSESIK     | 644.8593              |
| 4.        | P00330<br>(ADH1_YEAST)           | Alcohol dehydrogenase 1 (ADH1)             | GVIFYESHGK       | 568.7909              |
|           |                                  |                                            | ANELLINVK        | 507.3033              |
|           |                                  |                                            | IGDYAGIK         | 418.7294              |
|           |                                  |                                            | VLGIDGGEGK       | 472.7569              |
|           |                                  |                                            | EALDFFAR         | 484.7457              |
|           |                                  |                                            | VVGLSTLPEIYEK    | 724.406               |
| 5.        | P63048<br>(RL40_BOVIN)           | Ubiquitin (UBA52)                          | TITLEVEPSDTIENVK | 894.4675              |
|           |                                  |                                            | TLSDYNIQK        | 541.2798              |
|           |                                  |                                            | ESTLHLVLR        | 534.3139              |
|           |                                  |                                            | EGIPPDQQR        | 520.2618              |

**Table S2:** Target proteins and corresponding proteotypic peptides selected for chimeric protein CP02. Histone peptides were selected from *Danio rerio* (Zebrafish)

| S.No | Protein UniProt accession number | Protein Name (Gene Name)                   | Peptide sequence | [M+2H] <sup>2+</sup><br>m/z |
|------|----------------------------------|--------------------------------------------|------------------|-----------------------------|
| 1.   | P00489<br>(PYGM_RABIT)           | Glycogen phosphorylase, muscle form (PYGM) | GLAGVENVTELK     | 615.3405                    |
|      |                                  |                                            | VAAAFPGDVDR      | 559.2855                    |
|      |                                  |                                            | DFYELEPHK        | 589.2796                    |
|      |                                  |                                            | VFADYEEYVK       | 631.8006                    |
| 2    | P02769<br>(ALBU_BOVIN)           | Bovine Serum Albumin (ALB)                 | LVNELTEFAK       | 582.3193                    |
|      |                                  |                                            | YLYEIAR          | 464.2504                    |
|      |                                  |                                            | DAFLGSFLYEYSR    | 784.3754                    |
|      |                                  |                                            | HLVDEPQNLIK      | 653.3617                    |
|      |                                  |                                            | LGEYGFQNALIVR    | 740.4018                    |
|      |                                  |                                            | QTALVELLK        | 507.8128                    |
| 3    | A4VAK6                           | Histone H4 (hist1h4l)                      | DNIQGITKPAIR     | 663.3809                    |
|      |                                  |                                            | ISGLIYEETR       | 590.8141                    |
|      |                                  |                                            | VFLENVIR         | 495.2926                    |
|      |                                  |                                            | DAVTYTEHAK       | 567.7749                    |
|      |                                  |                                            | TVTAMDVVYALK     | 655.8549                    |
| 4.   | B3DJF8                           | Histone H2B (si:dkey-108k21.22)            | ESYAIYVYK        | 568.2872                    |
|      |                                  |                                            | EIQTAVR          | 408.7324                    |
|      |                                  |                                            | LLLPGELAK        | 477.3051                    |
|      |                                  |                                            | AMGIMNSFVNDIFER  | 872.4133                    |
|      |                                  |                                            | QVHPDTGISSK      | 584.8015                    |
| 5.   | Q7ZTT0                           | Histone H2A (phc2b)                        | AGLQFPVGR        | 472.7693                    |
|      |                                  |                                            | HIQLAVR          | 418.759                     |
|      |                                  |                                            | EPNAGTEAQSQDF    | 697.2966                    |
| 6.   | Q6PI20                           | Histone H3.3 (h3f3a)                       | YRPGTVALR        | 516.8011                    |
|      |                                  |                                            | STELLIR          | 416.2504                    |
|      |                                  |                                            | EIAQDFK          | 425.7191                    |

**Table S3:** Target proteins and corresponding proteotypic peptides selected for chimeric protein CP03.

| S.No | Protein UniProt accession number | Protein Name (Gene Name)                         | Peptide sequence        | [M+2H] <sup>2+</sup> m/z |
|------|----------------------------------|--------------------------------------------------|-------------------------|--------------------------|
| 1.   | P00489 (PYGM_RABIT)              | Glycogen phosphorylase, muscle form (PYGM)       | GLAGVENVTELK            | 615.3405                 |
|      |                                  |                                                  | VAAAFPGDVDR             | 559.2855                 |
|      |                                  |                                                  | DFYELEPHK               | 589.2796                 |
|      |                                  |                                                  | VFADYEEYVK              | 631.8006                 |
| 2.   | P02769 (ALBU_BOVIN)              | Bovine Serum Albumin (ALB)                       | LVNELTEFAK              | 582.3193                 |
|      |                                  |                                                  | LYYEIAR                 | 464.2504                 |
|      |                                  |                                                  | DAFLGSFLYEYSR           | 784.3754                 |
|      |                                  |                                                  | HLVDEPQNLIK             | 653.3617                 |
|      |                                  |                                                  | LGEYGFQNALIVR           | 740.4018                 |
|      |                                  |                                                  | QTALVELLK               | 507.8128                 |
| 3.   | P04040                           | Catalase (CAT)                                   | DPILFPSFIHSQK           | 764.912                  |
|      |                                  |                                                  | NLSVEDAAR               | 487.7483                 |
|      |                                  |                                                  | LSQEDPDY GIR            | 646.8105                 |
|      |                                  |                                                  | DLFNAIATGK              | 525.2853                 |
|      |                                  |                                                  | FNTANDDNVTQVR           | 747.3531                 |
|      |                                  |                                                  | AFYVNVLNEEQR            | 741.3729                 |
|      |                                  |                                                  | NAIHTFVQSGSHLAAR        | 859.9518                 |
| 4.   | P53350                           | Serine/threonine-protein kinase PLK1 (PLK1)      | AGVPGVAAPGAPAAAPPAK     | 785.4403                 |
|      |                                  |                                                  | LGNLFLNEDLEVK           | 752.4067                 |
|      |                                  |                                                  | HINPVAASLIQK            | 645.8803                 |
|      |                                  |                                                  | FSIAPSSLDPSNR           | 695.8518                 |
|      |                                  |                                                  | QEEAEDPACIPIFWVSK       | 1009.9782                |
|      |                                  |                                                  | LILYNDGDSLQYIER         | 906.4623                 |
| 5.   | Q71U36                           | Tubulin alpha-1A chain (TUBA1A)                  | TIGGGDDSFNTFFSETGAGK    | 1004.451                 |
|      |                                  |                                                  | AVFVDLEPTVIDEVR         | 851.4547                 |
|      |                                  |                                                  | QLFHPEQLITGK            | 705.8925                 |
|      |                                  |                                                  | NLDIERPTYTNLNR          | 859.9448                 |
|      |                                  |                                                  | IHFPLATYAPVISA EK       | 878.9846                 |
|      |                                  |                                                  | VGINYQPPTVVPGGDLAK      | 912.9968                 |
| 6.   | P60484                           | Phosphatase and tensin homolog (PTEN)            | NNIDDVVR                | 472.7435                 |
|      |                                  |                                                  | IYNLCAER                | 519.7557                 |
|      |                                  |                                                  | AQEALDFYGEVR            | 699.3384                 |
|      |                                  |                                                  | YVYYYSYLLK              | 687.8529                 |
|      |                                  |                                                  | IYSSNSGPTR              | 541.2681                 |
|      |                                  |                                                  | FMYFEFPQPLPVC GDIK      | 1052.5011                |
| 7.   | P31749                           | RAC-alpha serine/threonine-protein kinase (AKT1) | NDGTFIGYK               | 507.7482                 |
|      |                                  |                                                  | CLQWTTVIER              | 653.3343                 |
|      |                                  |                                                  | DEVAHTLTENR             | 642.812                  |
|      |                                  |                                                  | HPFLTALK                | 463.7757                 |
|      |                                  |                                                  | TFCGTPEYLAPEVLEDNDYGR   | 1223.5483                |
|      |                                  |                                                  | LFELILMEEIR             | 703.3916                 |
| 8.   | P04406                           | Glyceraldehyde-3-phosphate dehydrogenase (GAPDH) | VGVNGFGR                | 403.2192                 |
|      |                                  |                                                  | LVINGNPITIFQER          | 807.4531                 |
|      |                                  |                                                  | VIHDNFGIVEGLMTTVHAIATQK | 1298.1836                |
|      |                                  |                                                  | GALQNIIPASTGAAK         | 706.3984                 |

|  |  |                |          |
|--|--|----------------|----------|
|  |  | VPTANVSVDLTCR  | 765.9009 |
|  |  | LISWYDNEFGYSNR | 882.4048 |

**Table S4:** Target proteins and corresponding proteotypic peptides selected for chimeric protein CP04.

| S.No | Protein UniProt accession number | Protein Name (Gene Name)                   | Peptide sequence       | [M+2H] <sup>2+</sup><br>m/z |
|------|----------------------------------|--------------------------------------------|------------------------|-----------------------------|
| 1.   | P00489<br>(PYGM_RABIT)           | Glycogen phosphorylase, muscle form (PYGM) | GLAGVENVTELK           | 615.3405                    |
|      |                                  |                                            | VAAAFPGDVDR            | 559.2855                    |
|      |                                  |                                            | DFYELEPHK              | 589.2796                    |
|      |                                  |                                            | VFADYEEYVK             | 631.8006                    |
| 2.   | P02769<br>(ALBU_BOVIN)           | Bovine Serum Albumin (ALB)                 | LVNELTEFAK             | 582.3193                    |
|      |                                  |                                            | YLYEIAR                | 464.2504                    |
|      |                                  |                                            | DAFLGSFLYEYSR          | 784.3754                    |
|      |                                  |                                            | HLVDEPQNLK             | 653.3617                    |
|      |                                  |                                            | LGEYGFQNALIVR          | 740.4018                    |
|      |                                  |                                            | QTALVELLK              | 507.8128                    |
| 3    | A0A0B4K7R8                       | Crumbs (crb)                               | GSTLSAQQGSQFK          | 669.836                     |
|      |                                  |                                            | NEPVSYLELINGR          | 808.939                     |
|      |                                  |                                            | NIGDSYVAAK             | 519.267                     |
|      |                                  |                                            | LDNGYNHLIEVVR          | 514.607                     |
| 4    | A8JUP3                           | Cht6 (Cht6)                                | LVLGIPTYGR             | 544.827                     |
|      |                                  |                                            | FSPLVASNER             | 560.295                     |
|      |                                  |                                            | LTEAEGSSLYIGGR         | 726.87                      |
|      |                                  |                                            | STDAEEDPQVIK           | 666.32                      |
| 5    | Q9VGT0                           | UDP-glycosyltransferase 35b (Ugt35b)       | FADQDNDLVNLR           | 710.347                     |
|      |                                  |                                            | LSNFVDTTVAWLNYR        | 899.962                     |
|      |                                  |                                            | FFVSVTR                | 428.24                      |
|      |                                  |                                            | VQLTDLNR               | 479.769                     |
| 6    | E1JI40                           | Vermiform (verm)                           | DVFIPDVFNYYK           | 735.867                     |
|      |                                  |                                            | ILAIFFPGPSQYINVVPYLK   | 1188.67                     |
|      |                                  |                                            | VPIWPYTYLFR            | 727.895                     |
|      |                                  |                                            | GTFFVSHK               | 461.743                     |
| 7    | Q9VGT3                           | GM04645p (Ugt86Da)                         | GHEISVFSLTHK           | 452.242                     |
|      |                                  |                                            | APLGLHFHASWLK          | 492.942                     |
|      |                                  |                                            | IINNPEATQR             | 578.309                     |
|      |                                  |                                            | AVYWVEHVSR             | 623.323                     |
| 8    | Q7K3B7                           | LD40177p (CG11208)                         | SHYHVGSALAK            | 390.541                     |
|      |                                  |                                            | AEQNGYGVTVHYEELSSAK    | 694.664                     |
|      |                                  |                                            | GSAYAHAENTLR           | 645.316                     |
|      |                                  |                                            | SEGDLTQITPPSALGVQVR    | 984.523                     |
| 9    | A0A0B4LGS0                       | Amylase proximal (Amy-p)                   | AEEVEAVQIIAESLK        | 771.426                     |
|      |                                  |                                            | AANQLTDRPTIINVAISPSSDR | 780.418                     |
|      |                                  |                                            | GHGAGGADVLTYSK         | 623.316                     |
|      |                                  |                                            | DLNQGNISYVQDK          | 690.825                     |



|    |        |                                                                                  |                       |         |
|----|--------|----------------------------------------------------------------------------------|-----------------------|---------|
|    |        |                                                                                  | SLVFVDNHDNQR          | 722.354 |
|    |        |                                                                                  | SEYTGLGAITEFR         | 722.36  |
|    |        |                                                                                  | VVEFLDHLIDLGVAGFR     | 950.52  |
| 10 | Q9VJ86 | Bicoid stability factor (bsf)                                                    | IGALDTSR              | 416.731 |
|    |        |                                                                                  | LIELLVR               | 428.287 |
|    |        |                                                                                  | LADLLQEER             | 600.335 |
|    |        |                                                                                  | VNGEPVDVGAFFIR        | 760.401 |
|    |        |                                                                                  | ITPDVVGAIVQEATTYFR    | 990.527 |
|    |        |                                                                                  | ATQLSEQLGSELTPK       | 801.423 |
| 11 | Q9VJ80 | LD42267p (CG10211)                                                               | LLAADYADGVSQPR        | 738.381 |
|    |        |                                                                                  | ILSWNAVNLVGLK         | 745.922 |
|    |        |                                                                                  | ASEQPGLTAIHTAFLR      | 571.309 |
|    |        |                                                                                  | LLPAQYEDGISAPR        | 765.404 |
| 12 | Q7JWF1 | Electron transfer flavoprotein-ubiquinone oxidoreductase, mitochondrial (Etf-QO) | GIATNDVGIK            | 529.796 |
|    |        |                                                                                  | DTFSFLTGSGR           | 594.289 |
|    |        |                                                                                  | AINEGGFQSLPQK         | 694.862 |
|    |        |                                                                                  | FGLNEGSEPPQAYGIGLK    | 890.45  |
|    |        |                                                                                  | ITTHYTLNPR            | 608.331 |
| 13 | Q9VG97 | Inactive glutathione S-transferase D3 (GstD3)                                    | AILVYLVEK             | 524.326 |
|    |        |                                                                                  | ITPGWEENWAGALDVK      | 893.443 |
|    |        |                                                                                  | INPQHSIPTLVDNGFTIWESR | 808.750 |
|    |        |                                                                                  | ALGLEFNK              | 446.251 |
| 14 | M9NF15 | Axotactin (axo)                                                                  | INLDPYALYVIVEK        | 825.462 |
|    |        |                                                                                  | TNFDDSSALFYASGESLK    | 932.933 |
|    |        |                                                                                  | VLTTGGDAGSNR          | 574.289 |
| 15 | Q9VZJ8 | RH40737p (CG11594)                                                               | LGSDVQPPGR            | 513.272 |
|    |        |                                                                                  | VFLQLENQR             | 630.359 |
|    |        |                                                                                  | NLSQTFGNIWR           | 668.344 |
|    |        |                                                                                  | VFDLPDFLTWR           | 704.866 |
| 16 | Q9VF24 | Crossveinless d (cv-d)                                                           | GSTVQFAAR             | 468.748 |
|    |        |                                                                                  | DGAISHVVK             | 536.792 |
|    |        |                                                                                  | YFNAYLSDR             | 574.773 |
|    |        |                                                                                  | FSEPYDSTLSDVIK        | 800.889 |
| 17 | Q9U1L2 | CG3699 (EG:BACR7A4.14)                                                           | NVANLEATK             | 480.262 |
|    |        |                                                                                  | DADAIVQQLAK           | 636.844 |
|    |        |                                                                                  | GTQAEIVVADVTK         | 665.864 |
|    |        |                                                                                  | VGDVTEVAEAVAFASSK     | 896.972 |
| 18 | A1ZB68 | FI01423p (GstE3)                                                                 | SVLLTLR               | 401.264 |
|    |        |                                                                                  | IDALEGVYK             | 504.274 |
|    |        |                                                                                  | ALNLDFDYK             | 549.777 |
|    |        |                                                                                  | AITFPLFWENK           | 683.364 |
|    |        |                                                                                  | LTLYGIDGSPVVR         | 694.383 |
|    |        |                                                                                  | ELPYEEANGSR           | 714.325 |
| 19 | P20432 | Glutathione S-transferase D1 (GstD1)                                             | AVGVELNK              | 415.243 |
|    |        |                                                                                  | APADPEAFK             | 473.237 |
|    |        |                                                                                  | AIQVYLVEK             | 531.813 |
|    |        |                                                                                  | LLNLQAGEHLKPEFLK      | 925.531 |
|    |        |                                                                                  | INPQHTIPTLVDNGFALWESR | 803.417 |
| 20 | A0A1F4 | Protein eyes shut (eys)                                                          | GLVVSQTR              | 394.735 |

|    |            |                                                            |                    |         |
|----|------------|------------------------------------------------------------|--------------------|---------|
|    |            |                                                            | SLSDVSLTGR         | 517.777 |
|    |            |                                                            | GNSYLILPPPR        | 613.849 |
|    |            |                                                            | ISGPSNHVTVVR       | 633.351 |
|    |            |                                                            | NAAFSGDSYVSHR      | 705.824 |
| 21 | A0A0B4LGM0 | Prominin (prom)                                            | SVVNVGLGQALR       | 606.857 |
|    |            |                                                            | STQEEVDHIR         | 607.294 |
|    |            |                                                            | SAVHDVEVFLK        | 415.229 |
|    |            |                                                            | VSTAIDAISSGR       | 638.349 |
|    |            |                                                            | VALQIQDVATSSR      | 694.381 |
| 22 | A0A0B4KI35 | Chaoptin (chp)                                             | LEEISLR            | 430.248 |
|    |            |                                                            | LLELHDNR           | 505.275 |
|    |            |                                                            | LFNNFDVLR          | 569.306 |
|    |            |                                                            | LAVLDLSHNR         | 569.323 |
|    |            |                                                            | ASLSGIQSHAFK       | 623.333 |
|    |            |                                                            | TFFDGNPIHTLR       | 709.366 |
|    |            |                                                            | DFGVELEDLQITR      | 767.892 |
| 23 | A0A0B4KI71 | Microtubule-associated protein 205 (Map205)                | STISSTTTVR         | 526.783 |
|    |            |                                                            | TSTTSSLTGNPR       | 611.307 |
|    |            |                                                            | TSVATVAGGAVVGATK   | 694.891 |
|    |            |                                                            | LLVPGSSSTTTTSSLR   | 803.935 |
|    |            |                                                            | LLPDTTDEQLLTSALEEK | 1008.53 |
| 24 | L0MN91     | Bent (bt)                                                  | STGNIFAAK          | 454.746 |
|    |            |                                                            | VFAVNSAGR          | 460.751 |
|    |            |                                                            | IFADNVYGR          | 527.769 |
|    |            |                                                            | GVAEDFAPSFVK       | 633.823 |
|    |            |                                                            | HDGGSPITGYIIEK     | 743.881 |
| 25 | E1JI76     | Z band alternatively spliced PDZ-motif protein 66 (Zasp66) | HYPNPAVR           | 477.251 |
|    |            |                                                            | VVGSEADTGR         | 495.746 |
|    |            |                                                            | DAPTTESYLR         | 576.78  |
|    |            |                                                            | STVPFATSESNR       | 648.315 |
|    |            |                                                            | LVGGNDLDTPLIITR    | 798.953 |
| 26 | M9PBI9     | Titin (sls)                                                | IAELEGLSR          | 522.788 |
|    |            |                                                            | IQYLEDSTR          | 562.783 |
|    |            |                                                            | IGEAISSIR          | 580.816 |
|    |            |                                                            | FITQIVDVK          | 582.338 |
|    |            |                                                            | AEDAGVYLVVAR       | 631.841 |
|    |            |                                                            | TYYDFGFVALDIK      | 832.936 |
| 27 | M9PCC1     | Receptor of activated protein kinase C 1 (Rack1)           | VWQVSVSAH          | 506.763 |
|    |            |                                                            | ALLWDLNDGK         | 572.804 |
|    |            |                                                            | DVLSVAFSADNR       | 647.327 |
|    |            |                                                            | LWDLAAGK           | 437.246 |
| 28 | A1Z9J3     | Short stop (shot)                                          | LNNDLIAR           | 464.764 |
|    |            |                                                            | FQEALAGLSK         | 532.295 |
|    |            |                                                            | LAAHDALGGAAK       | 365.537 |
|    |            |                                                            | SAGSGVSTTAIEK      | 604.312 |
|    |            |                                                            | IVQVQIDDVGK        | 607.344 |
|    |            |                                                            | SELDVFSDWLQVAR     | 832.921 |
|    |            |                                                            | FSQSDFGLDQGETLLR   | 906.943 |

|    |            |                                            |                      |         |
|----|------------|--------------------------------------------|----------------------|---------|
| 29 | E1JJE6     | Uncharacterized protein (CG42492)          | ESLLEITIYHQK         | 737.402 |
|    |            |                                            | GAAYQEAPVDAEVAVTPK   | 908.461 |
|    |            |                                            | ISAFGLFTYSVFSIIAGSLK | 1061.09 |
|    |            |                                            | VFANPVQLEFYGFVPSIIQR | 1255.67 |
| 30 | M9NE68     | Heat shock protein 23 (Hsp23)              | QVGASSGSSGAVSK       | 611.308 |
|    |            |                                            | IVQIQQVGPAPHLNVK     | 822.484 |
|    |            |                                            | VQDNSVLVEGNHEER      | 575.612 |
| 31 | Q9W3C3     | CG2004 (CG2004)                            | VLPAIEAFQK           | 558.327 |
|    |            |                                            | FSEATLDEIIR          | 647.339 |
|    |            |                                            | FHGVALAFNALDSK       | 745.395 |
|    |            |                                            | ENAILTDIWNITPFK      | 887.975 |
| 32 | Q9VBS7     | Uncharacterized protein (CG10550)          | VIVDILLK             | 456.811 |
|    |            |                                            | TILVDLQVGK           | 543.332 |
|    |            |                                            | LAEHLHAASVVAK        | 604.854 |
|    |            |                                            | EAGLEIELAPK          | 585.325 |
| 33 | P53501     | Actin-57B (Act57B)                         | AGFAGDDAPR           | 488.728 |
|    |            |                                            | SYELPDGQVITIGNER     | 895.95  |
|    |            |                                            | VAPEEHPVLLTEAPLNPK   | 977.537 |
|    |            |                                            | GYSFTTTAER           | 566.767 |
|    |            |                                            | EITSLAPSTIK          | 580.332 |
| 34 | A0A0B4LH50 | Actin 87E (Act87E)                         | EITALAPSTIK          | 572.335 |
|    |            |                                            | QEYDESGPGIVHR        | 743.85  |
| 35 | X2JCP8     | Actin 5C (Act5C)                           | QEYDESGPSIVHR        | 758.856 |
| 36 | Q8IMT8     | Veli (veli)                                | SIELLEK              | 416.245 |
|    |            |                                            | LQASGDFPTTK          | 582.799 |
|    |            |                                            | EQNSPIYISR           | 603.81  |
|    |            |                                            | ATVAFAFAASEGHAPR     | 531.603 |
| 37 | P06002     | Opsin Rh1 (ninaE)                          | YQVIVK               | 375.232 |
|    |            |                                            | SSDAQSQATASEAESK     | 798.854 |
| 38 | P19334     | Transient receptor potential protein (trp) | ALSASSLIALSSR        | 638.368 |
|    |            |                                            | DPVLTAFQLSWELK       | 823.945 |
|    |            |                                            | DDYGITEDDIIIEVR      | 826.888 |
|    |            |                                            | ATAWVIVHR            | 526.803 |
| 39 | X2JCI4     | Phosphoinositide phospholipase C (norpA)   | VELELWLK             | 515.303 |
|    |            |                                            | VVLPDLAVLR           | 547.851 |
|    |            |                                            | ALGIEEQSGGAAR        | 629.824 |
|    |            |                                            | VDEYGFFLYWK          | 733.854 |
| 40 | P23625     | G protein alpha q subunit (Galphaq)        | YYLSDLAR             | 500.758 |
|    |            |                                            | IEQADYLPTEQDILR      | 902.459 |
|    |            |                                            | VPTTGILEYPFDLDGIVFR  | 1076.58 |
|    |            |                                            | TIITYPWFQNSSVILFLNK  | 1142.62 |
| 41 | M9NES0     | Arrestin 1 (Arr1)                          | AGIAVEGDIK           | 486.771 |
|    |            |                                            | DAFGIIVSYAVK         | 641.856 |
|    |            |                                            | DTALASTTLIASQDAR     | 817.424 |
|    |            |                                            | DFLLSPGELELEVTLDK    | 959.507 |
| 42 | P19107     | Phosrestin-1 (Arr2)                        | VFGQLATTYR           | 578.311 |

|    |        |                                                           |                   |         |
|----|--------|-----------------------------------------------------------|-------------------|---------|
|    |        |                                                           | LQYAPLNR          | 487.774 |
|    |        |                                                           | ISLEVTLDR         | 523.298 |
|    |        |                                                           | LLQPAPGTIEK       | 583.842 |
| 43 | C7LAH9 | Moesin/ezrin/radixin homolog 1 (Moe)                      | FYPEDVAEELIQDITLR | 1026.02 |
|    |        |                                                           | IGFPWSEIR         | 552.796 |
|    |        |                                                           | TTHTAGFLANDR      | 652.324 |
|    |        |                                                           | LFYLQVK           | 455.774 |
| 44 | P10676 | Neither inactivation nor afterpotential protein C (ninaC) | AAIELNR           | 393.728 |
|    |        |                                                           | GDNILLTK          | 437.256 |
|    |        |                                                           | VPPEVPPSK         | 475.272 |
|    |        |                                                           | LVDFIINR          | 495.293 |
| 45 | P45594 | Cofilin/actin-depolymerizing factor homolog (tsr)         | SLVGVQK           | 365.727 |
|    |        |                                                           | QIDVETVADR        | 573.295 |
|    |        |                                                           | YIQATDLSEASR      | 677.336 |
|    |        |                                                           | NAEYDQFLEDIQK     | 806.879 |

**Table S5:** Data-dependent acquisition (DDA) settings used in this study

| Data dependent acquisition setting for LTQ Orbitrap Velos mass spectrometer |                             |
|-----------------------------------------------------------------------------|-----------------------------|
| Parameter                                                                   | Value                       |
| Scan range                                                                  | 350-1700 m/z                |
| Microscans                                                                  | 1                           |
| Nominal resolution (at 400 m/z)                                             | 60,000                      |
| Lock mass                                                                   | 445.120025 m/z (Siloxane)   |
| Data mode                                                                   | Centroid                    |
| Target ion count                                                            | 1x10E6 (FT) and 5x10E4 (IT) |
| Max. fill time                                                              | 500 ms (FT) and 100 ms (IT) |
| Automatic gain control (AGC)                                                | ON                          |
| Activation type (MS/MS)                                                     | CID                         |
| Intensity threshold for DDA                                                 | 5000                        |
| Isolation width                                                             | 2.0 m/z                     |
| Normalized collision energy (NCE)                                           | 35%                         |
| Activation Q                                                                | 0.25                        |
| Activation time                                                             | 30 ms                       |
| Dynamic exclusion list size                                                 | 500                         |
| Dynamic exclusion time                                                      | 30s                         |
| Exclusion mass width                                                        | 5ppm                        |
| Data dependent acquisition setting for Q Exactive HF mass spectrometer      |                             |
| Parameter                                                                   | Value                       |
| Full scan                                                                   |                             |
| Scan range                                                                  | 350-1700 m/z                |
| Microscans                                                                  | 1                           |
| Resolution                                                                  | 60,000                      |
| Lock mass                                                                   | 445.120025 m/z (Siloxane)   |
| Data mode                                                                   | Profile                     |
| AGC target                                                                  | 3e6                         |
| Maximum IT                                                                  | 50 ms                       |
| dd-MS2                                                                      |                             |
| Microscans                                                                  | 1                           |
| Resolution                                                                  | 15,000                      |
| Data mode                                                                   | Centroid                    |
| AGC target                                                                  | 1e5                         |
| Maximum IT                                                                  | 30 ms                       |
| TopN (no msx)                                                               | 12                          |
| Isolation window                                                            | 1.6 m/z                     |
| Isolation offset                                                            | 0.0 m/z                     |
| Fixed first mass                                                            | 140 m/z                     |
| NCE (no stepped NCE)                                                        | 25                          |
| Apex trigger                                                                | Off                         |
| Charge exclusion                                                            | Unassigned, 1 and >8        |
| Peptide match                                                               | Off                         |
| Exclude isotopes                                                            | On                          |
| Dynamic exclusion                                                           | 30s                         |

**Table S6: Antibodies used for quantifying proteins in HeLa cells**

| <b>Primary antibodies</b>                                         |                  |              |                       |
|-------------------------------------------------------------------|------------------|--------------|-----------------------|
| <b>Target</b>                                                     | <b>Company</b>   | <b>Code</b>  | <b>dilution in WB</b> |
| Serine/Threonine Kinase 1 (AKT1), mouse monoclonal                | Sigma-Aldrich    | P2482        | 1:5000                |
| Catalase (CAT), mouse monoclonal                                  | Sigma-Aldrich    | C0979        | 1:2000                |
| Polo like Kinase 1 (PLK1), mouse monoclonal                       | Sigma-Aldrich    | P5998        | 1:5000                |
| $\alpha$ -Tubulin (TUBA4A), mouse monoclonal                      | Sigma-Aldrich    | T6199        | 1:5000                |
| Glyceraldehyde-3-Phosphate Dehydrogenase (GAPDH), goat polyclonal | Acris Antibodies | AP16240PU-N* | 1:7000                |

\*at present discontinued by the manufacturer

| <b>Secondary antibodies</b>          |                |             |                       |
|--------------------------------------|----------------|-------------|-----------------------|
| <b>Name</b>                          | <b>Company</b> | <b>Code</b> | <b>dilution in WB</b> |
| IRDye® 680LT Donkey anti-Goat (H+L)  | LI-COR         | 925-68024   | 1:15000               |
| IRDye® 800CW Donkey anti-Mouse (H+L) | LI-COR         | 926-32212   | 1:15000               |

**Table S7: Human esiRNAs used to knock-down target proteins in HeLa cells**

| <b>esiRNAs</b> |                  |             |
|----------------|------------------|-------------|
| <b>Target</b>  | <b>Company</b>   | <b>Code</b> |
| RLUC           | Eupheria Biotech | EHURLUC     |
| AKT1           | Eupheria Biotech | EHU083501   |
| CATALASE       | Eupheria Biotech | EHU048671   |
| PLK1           | Eupheria Biotech | EHU051011   |
| TUBA4A         | Eupheria Biotech | EHU159831   |

**Table S8: Antibodies used for quantifying zebrafish histones**

| <b>Primary antibodies</b> |                |             |           |
|---------------------------|----------------|-------------|-----------|
| <b>Target</b>             | <b>Company</b> | <b>Code</b> | <b>WB</b> |
| H3                        | Abcam          | ab1791      | 1:10,000  |
| H4                        | Abcam          | ab10158     | 1:1,000   |
| H2A                       | Abcam          | ab18255     | 1:1,000   |
| H2B                       | Abcam          | ab1790      | 1:3,000   |
| $\alpha$ -tubulin         | Sigma          | T6074       | 1:20,000  |

| <b>Secondary antibodies</b>     |                |               |           |
|---------------------------------|----------------|---------------|-----------|
| <b>Name</b>                     | <b>Company</b> | <b>Code</b>   | <b>WB</b> |
| IRDye® 800CW donkey anti-rabbit | LI-COR         | P/N 925-32213 | 1:20,000  |
| IRDye® 800CW donkey anti-mouse  | LI-COR         | P/N 925-32212 | 1:20,000  |



**Table S9:** Absolute quantification of four histone proteins from zebrafish embryo at ten different developmental stage (BR=Biological replicate and each biological replicate value represents average of two technical replicates). The value in BR1, BR2 and BR3 columns represents amount of histone protein (in fmol) per embryo. The average CV and rCV is <10%

| Histone H4  | Stage   | BR1      | BR2      | BR3      | Average  | STDEV    | %CV      | Median   | MAD      | rSD      | %rCV     |
|-------------|---------|----------|----------|----------|----------|----------|----------|----------|----------|----------|----------|
|             | 1Cell   | 457.7922 | 404.7025 | 391.4224 | 417.9723 | 28.6741  | 6.860287 | 404.7025 | 13.28008 | 19.68905 | 4.865068 |
|             | 8Cell   | 329.6173 | 326.3716 | 471.9903 | 375.9931 | 67.89325 | 18.05705 | 329.6173 | 3.245678 | 4.812042 | 1.459888 |
|             | 64Cell  | 416.8338 | 435.7922 | 538.8788 | 463.8349 | 53.62552 | 11.56134 | 435.7922 | 18.9584  | 28.10773 | 6.449801 |
|             | 256Cell | 580.0844 | 538.1631 | 602.0019 | 573.4164 | 26.48514 | 4.618833 | 580.0844 | 21.91748 | 32.49486 | 5.601747 |
|             | 1K Cell | 800.1541 | 692.1338 | 737.5328 | 743.2736 | 44.28553 | 5.958174 | 737.5328 | 45.39893 | 67.30845 | 9.126165 |
|             | HIGH    | 791.3026 | 814.9278 | 699.5248 | 768.5851 | 49.77634 | 6.476361 | 791.3026 | 23.62529 | 35.02685 | 4.42648  |
|             | OBLONG  | 973.007  | 829.0689 | 760.894  | 854.3233 | 88.41688 | 10.34935 | 829.0689 | 68.17483 | 101.076  | 12.19151 |
|             | SPHERE  | 1007.126 | 973.5415 | 819.5227 | 933.3967 | 81.68011 | 8.750846 | 973.5415 | 33.58461 | 49.79255 | 5.114579 |
|             | DOME    | 1505.467 | 1451.782 | 1478.131 | 1478.46  | 21.91767 | 1.482466 | 1478.131 | 26.34882 | 39.06477 | 2.642848 |
|             | SHIELD  | 2227.938 | 2311.965 | 2303.745 | 2281.216 | 37.82236 | 1.657991 | 2303.745 | 8.21964  | 12.18644 | 0.528984 |
|             |         |          |          |          |          |          |          |          |          |          |          |
| Histone H2B | Stage   | BR1      | BR2      | BR3      | Average  | STDEV    | %CV      | Median   | MAD      | rSD      | %rCV     |
|             | 1Cell   | 194.2716 | 145.65   | 143.8195 | 161.247  | 23.36384 | 14.48947 | 145.65   | 1.830496 | 2.713893 | 1.863298 |
|             | 8Cell   | 183.294  | 201.006  | 263.9764 | 216.0921 | 34.62278 | 16.02223 | 201.006  | 17.71202 | 26.25984 | 13.0642  |
|             | 64Cell  | 259.3253 | 260.5473 | 314.4543 | 278.109  | 25.70486 | 9.24273  | 260.5473 | 1.221982 | 1.81171  | 0.695348 |
|             | 256Cell | 394.2926 | 369.6656 | 402.8801 | 388.9461 | 14.07693 | 3.61925  | 394.2926 | 8.58745  | 12.73175 | 3.229011 |
|             | 1K Cell | 590.3178 | 547.9452 | 546.5898 | 561.6176 | 20.30162 | 3.614848 | 547.9452 | 1.355396 | 2.00951  | 0.366735 |
|             | HIGH    | 602.5109 | 635.9684 | 526.4676 | 588.3156 | 45.81657 | 7.787753 | 602.5109 | 33.45759 | 49.60423 | 8.232919 |
|             | OBLONG  | 738.5126 | 732.591  | 625.5263 | 698.8766 | 51.92286 | 7.429474 | 732.591  | 5.921552 | 8.779293 | 1.198389 |
|             | SPHERE  | 762.2935 | 781.0886 | 690.0224 | 744.4682 | 39.25619 | 5.273052 | 762.2935 | 18.79515 | 27.86569 | 3.655507 |
|             | DOME    | 1193.542 | 1171.266 | 1289.459 | 1218.089 | 51.279   | 4.209791 | 1193.542 | 22.27623 | 33.02674 | 2.76712  |
|             | SHIELD  | 1720.818 | 2105.001 | 2407.573 | 2077.797 | 281.0254 | 13.52516 | 2105.001 | 302.5716 | 448.5927 | 21.3108  |
|             |         |          |          |          |          |          |          |          |          |          |          |
| Histone H2A | Stage   | BR1      | BR2      | BR3      | Average  | STDEV    | %CV      | Median   | MAD      | rSD      | %rCV     |
|             | 1Cell   | 249.3922 | 197.9448 | 188.0373 | 211.7914 | 26.89365 | 12.69818 | 197.9448 | 9.907552 | 14.68894 | 7.420724 |
|             | 8Cell   | 215.3167 | 242.5229 | 309.7799 | 255.8732 | 39.70305 | 15.51669 | 242.5229 | 27.2062  | 40.33591 | 16.6318  |
|             | 64Cell  | 301.5995 | 305.8671 | 367.6506 | 325.0391 | 30.18125 | 9.285421 | 305.8671 | 4.267666 | 6.327242 | 2.068624 |
|             | 256Cell | 432.3453 | 430.5412 | 453.6402 | 438.8423 | 10.48962 | 2.390293 | 432.3453 | 1.804121 | 2.67479  | 0.61867  |
|             | 1K Cell | 633.8255 | 597.9493 | 579.814  | 603.8629 | 22.44311 | 3.71659  | 597.9493 | 18.13531 | 26.88742 | 4.496605 |
|             | HIGH    | 632.6728 | 665.1393 | 563.4623 | 620.4248 | 42.40335 | 6.834568 | 632.6728 | 32.46651 | 48.13485 | 7.608174 |
|             | OBLONG  | 779.6588 | 734.8612 | 637.3996 | 717.3065 | 59.38882 | 8.27942  | 734.8612 | 44.79764 | 66.41698 | 9.038031 |
|             | SPHERE  | 825.9572 | 828.6819 | 731.978  | 795.539  | 44.95818 | 5.651286 | 825.9572 | 2.724675 | 4.039603 | 0.489081 |
|             | DOME    | 1374.179 | 1228.439 | 1266.959 | 1289.859 | 61.66213 | 4.780532 | 1266.959 | 38.51926 | 57.10866 | 4.507539 |
|             | SHIELD  | 1718.778 | 2144.869 | 1903.66  | 1922.435 | 174.4568 | 9.074783 | 1903.66  | 184.8823 | 274.1065 | 14.39892 |
|             |         |          |          |          |          |          |          |          |          |          |          |
| Histone H3  | Stage   | BR1      | BR2      | BR3      | Average  | STDEV    | %CV      | Median   | MAD      | rSD      | %rCV     |
|             | 1Cell   | 244.9543 | 220      | 260.0746 | 241.6763 | 16.52378 | 6.837154 | 244.9543 | 15.12029 | 22.41734 | 9.151641 |
|             | 8Cell   | 298.6748 | 317.298  | 430.7783 | 348.917  | 58.38181 | 16.73229 | 317.298  | 18.62317 | 27.61071 | 8.701823 |
|             | 64Cell  | 413.4805 | 387.1543 | 479.8892 | 426.8413 | 39.01986 | 9.141538 | 413.4805 | 26.32627 | 39.03133 | 9.439702 |
|             | 256Cell | 682.2903 | 582.4125 | 624.1576 | 629.6201 | 40.95749 | 6.505112 | 624.1576 | 41.74512 | 61.89132 | 9.915977 |
|             | 1K Cell | 927.4467 | 1290.012 | 926.6482 | 1048.036 | 171.1033 | 16.3261  | 927.4467 | 0.798579 | 1.183973 | 0.127659 |
|             | HIGH    | 968.1659 | 893.3207 | 922.0678 | 927.8515 | 30.8279  | 3.322504 | 922.0678 | 28.74711 | 42.62046 | 4.62227  |
|             | OBLONG  | 1049.45  | 976.9009 | 1047.411 | 1024.587 | 33.72979 | 3.292036 | 1047.411 | 2.039448 | 3.023686 | 0.288682 |
|             | SPHERE  | 1229.202 | 1178.453 | 1083.159 | 1163.605 | 60.53903 | 5.202714 | 1178.453 | 50.74838 | 75.23955 | 6.384602 |
|             | DOME    | 1916.443 | 1943.526 | 1867.927 | 1909.299 | 31.27372 | 1.637969 | 1916.443 | 27.08336 | 40.15378 | 2.095225 |
|             | SHIELD  | 3209.92  | ND       | 3467.35  | 3338.635 | 128.715  | 3.855317 | 3338.635 | #VALUE!  | #VALUE!  | #VALUE!  |
